# Supplementary material for: Surfaceome and Exoproteome Dynamics in Dual-Species Pseudomonas aeruginosa and Staphylococcus aureus Biofilms
Source: PubMed Central journal article supplement (PMC8267900; doi:10.3389/fmicb.2021.672975), 2021-06-25
Supplement: Presentation_1.pdf [file Presentation_1.pdf]

## Supplementary Material:

### Surfaceome and exoproteome dynamics in dual-species *Pseudomonas aeruginosa* and *Staphylococcus aureus* biofilms

Inés Reigada<sup>1†\*</sup>, Paola San-Martin-Galindo<sup>1†\*</sup>, Shella Gilbert-Girard<sup>1</sup>, Jacopo Chiaro<sup>1</sup>, Vincenzo Cerullo<sup>1</sup>, Kirsi Savijoki<sup>1</sup>, Tuula A. Nyman<sup>2</sup>, Adyary Fallarero<sup>1</sup> and Ilkka Miettinen<sup>1</sup>

<sup>1</sup>Drug Research Program, Division of Pharmaceutical Biosciences, Faculty of Pharmacy, University of Helsinki, Finland.

<sup>2</sup>Department of Immunology, Institute of Clinical Medicine, University of Oslo and Rikshospitalet Oslo, 0372 Oslo, Norway

† These authors have contributed equally to this work and share first authorship.

#### \* Correspondence:

Inés Reigada/ ines.reigada@helsinki.fi

Paola San-Martin-Galindo/paola.sanmartingalindo@helsinki.fi

## 1 Supplementary Figures

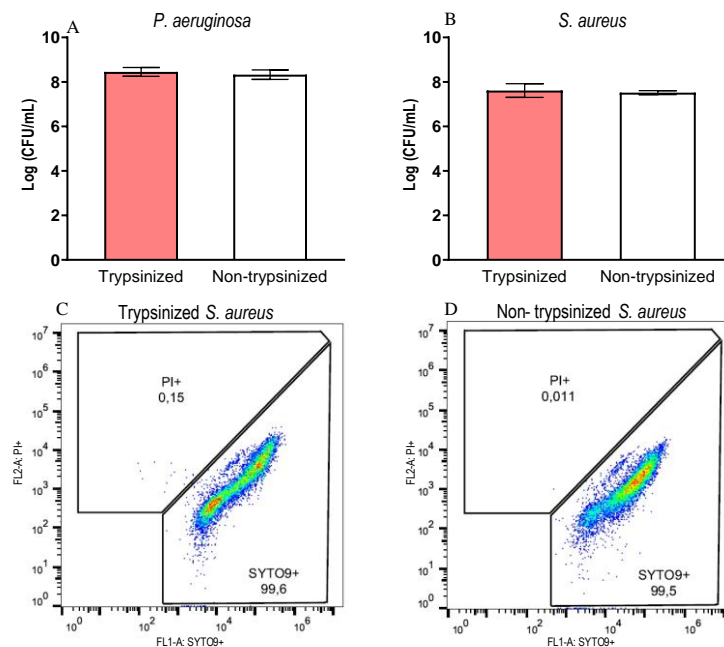

**Figure S1.** In A-B: Viable colonies recovered from *P. aeruginosa* PAO1 biofilms (A), and *S. aureus* ATCC 25923 biofilms (B) incubated 20 min with or without 55 ng/μl trypsin. The bars show the mean of two individually inoculated and treated biofilms ± SD. In C-D: Representative cytographs corresponding to the viable cells within the *S. aureus* biofilm with (C) and without (D) trypsinization (on the same conditions as in A-B). SYTO 9 was used to stain viable cells while PI was utilized to stain cells with disrupted cell membrane integrity.

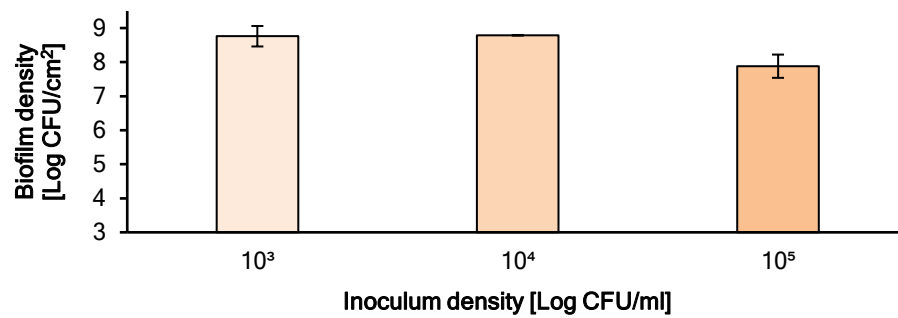

**Figure S2.** The effect of inoculum density on biofilm viable counts in *P. aeruginosa* monoculture. The bars show the mean of two separately harvested biofilms  $\pm$  SD.

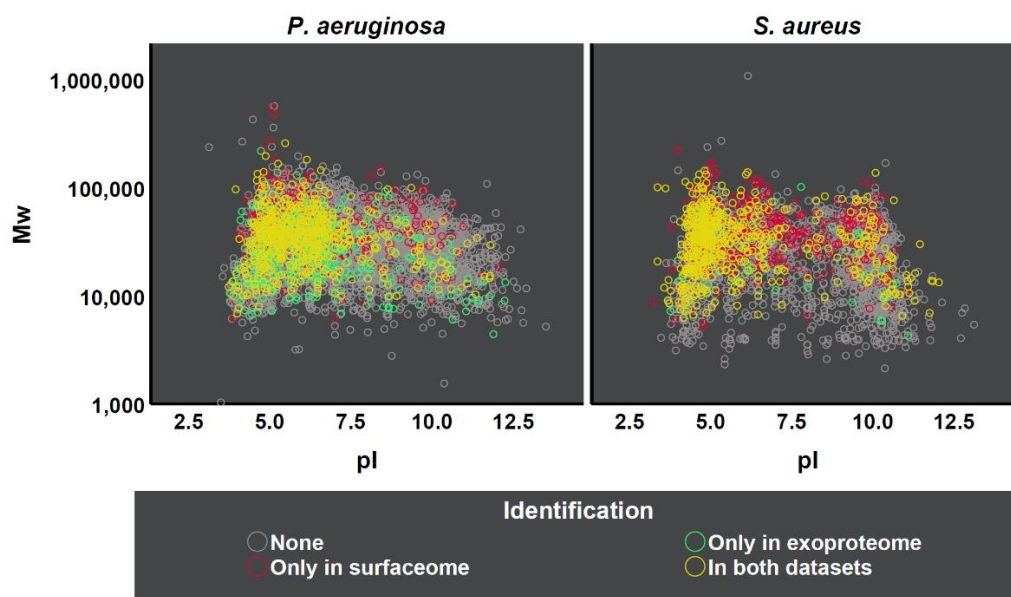

**Figure S3.** *In silico* 2DE maps illustrating the predicted isoelectric points (pI) and molar weights (Mw) of the identifications. The circle colors indicate the condition in which the protein was identified.

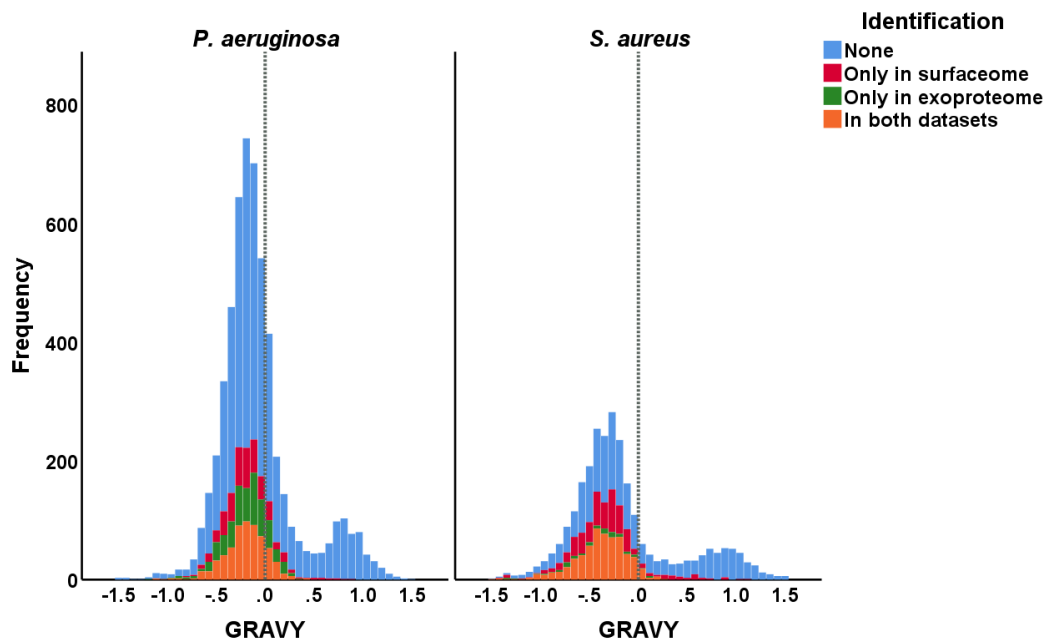

**Figure S4.** Grand average of hydropathicity (GRAVY) distribution of the mixed species identifications contrasted to the theoretical proteomes. From bottom to top, the stacked histograms represent the proteins identified in both the exoproteome and the surfaceome samples (orange), exclusively in exoproteomes (green), exclusively in surfaceomes (red), or not at all (blue). The vertical reference line separates the negative (hydrophilic) and positive (hydrophobic) values.

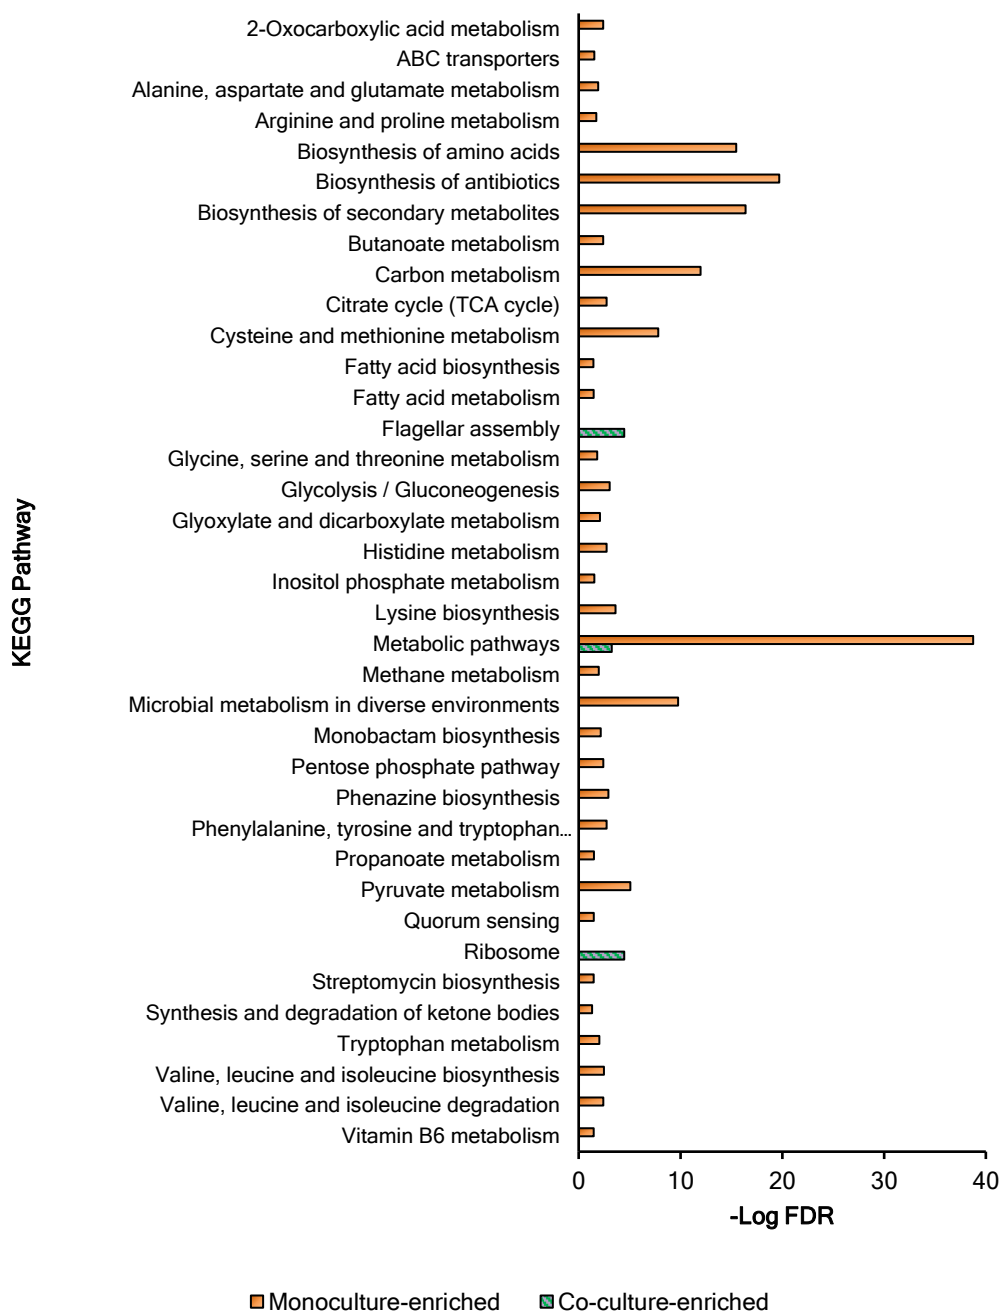

**Figure S5.** Geneset-based functional enrichment in monocultured vs. co-cultured *P. aeruginosa* biofilm exoproteomes. The statistical assessment of KEGG pathway enrichment was carried out using the STRING database (Szklarczyk et al. 2019). FDR: false discovery rate.

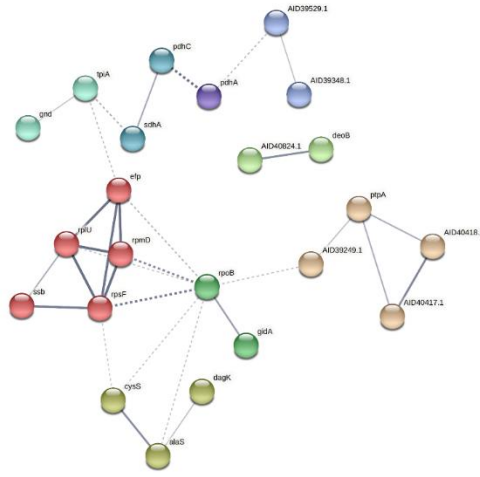

**Figure S6.** A STRING database (Szklarczyk et al., 2019) network of interacting proteins with significantly higher abundances in *S. aureus* co-culture versus monoculture exoproteome.

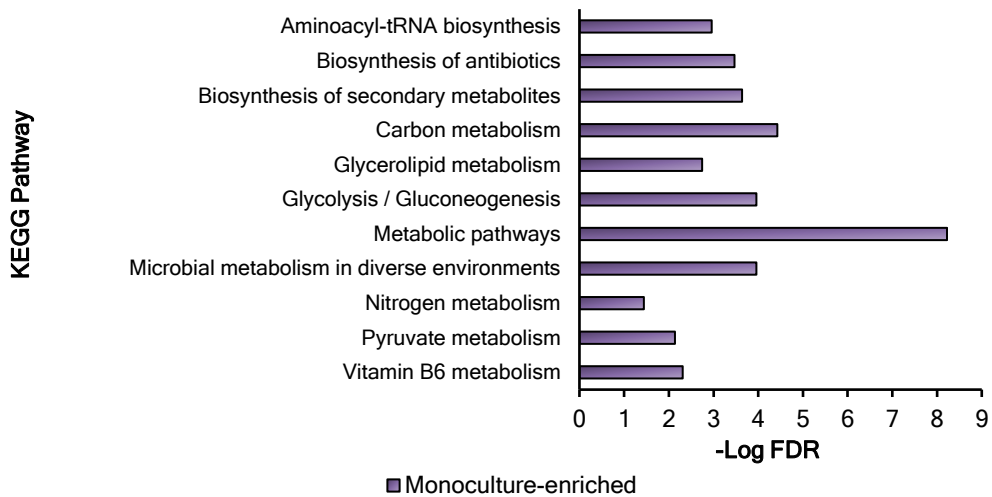

**Figure S7.** Geneset-based functional enrichment in monocultured vs co-cultured *S. aureus* biofilms exoproteome. The statistical assessment of KEGG pathway enrichment was carried out using the STRING database (Szklarczyk et al. 2019). FDR: false discovery rate.

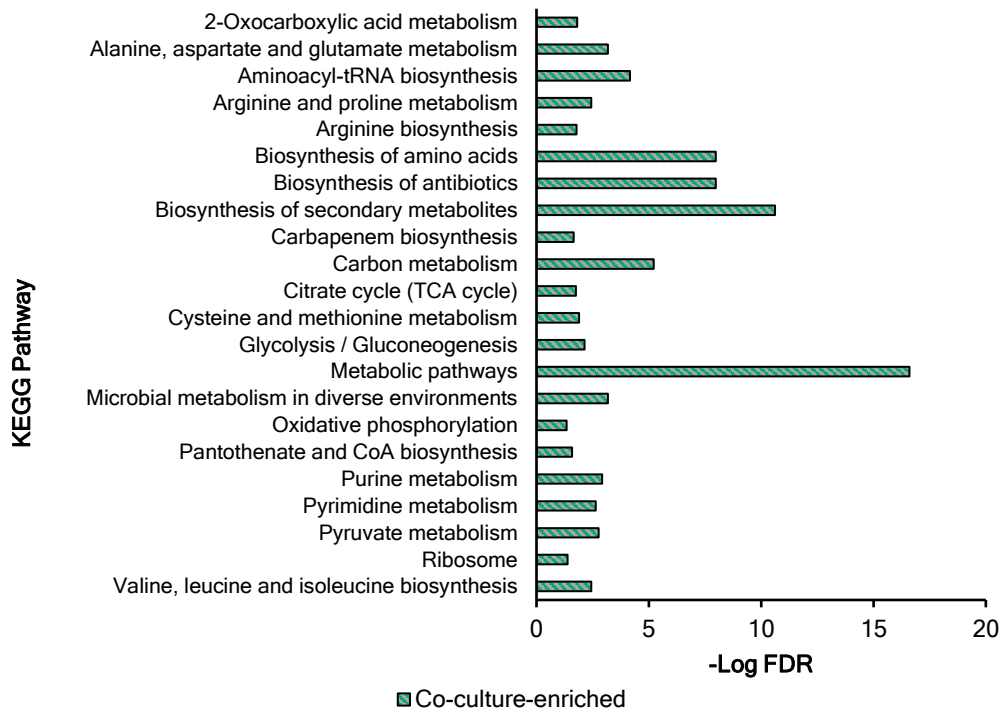

**Figure S8.** Geneset-based functional enrichment in monocultured vs. co-cultured *P. aeruginosa* biofilm surfaceomes. The statistical assessment of KEGG pathway enrichment was carried out using the STRING database (Szklarczyk et al. 2019).

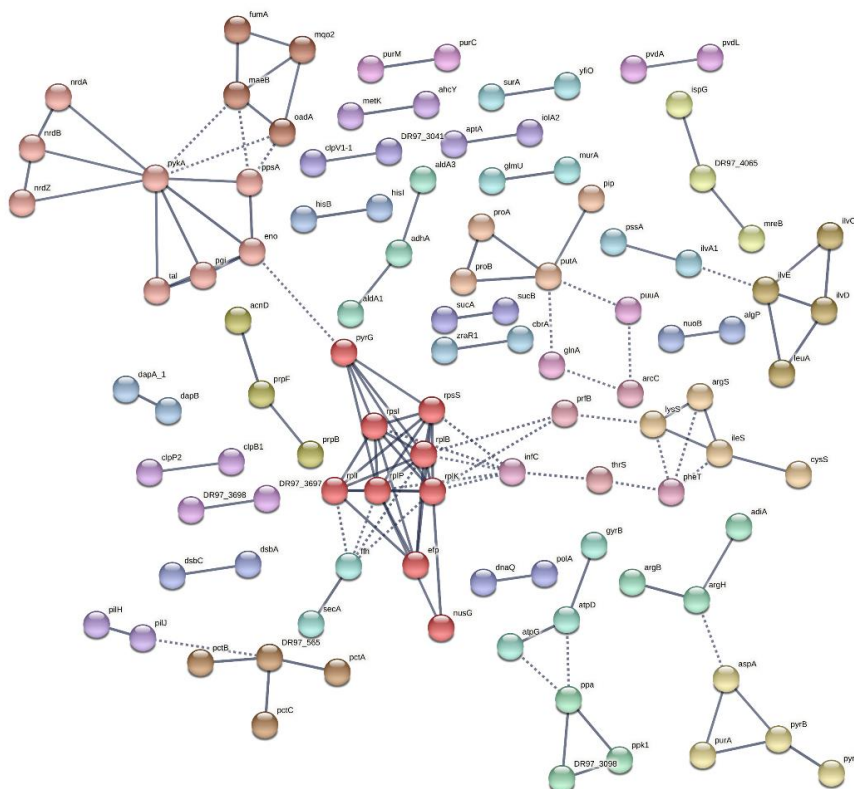

**Figure S9.** A STRING database (Szklarczyk et al., 2019) network of interacting proteins with significantly higher abundances in *P. aeruginosa* co-culture versus monoculture surfaceome.

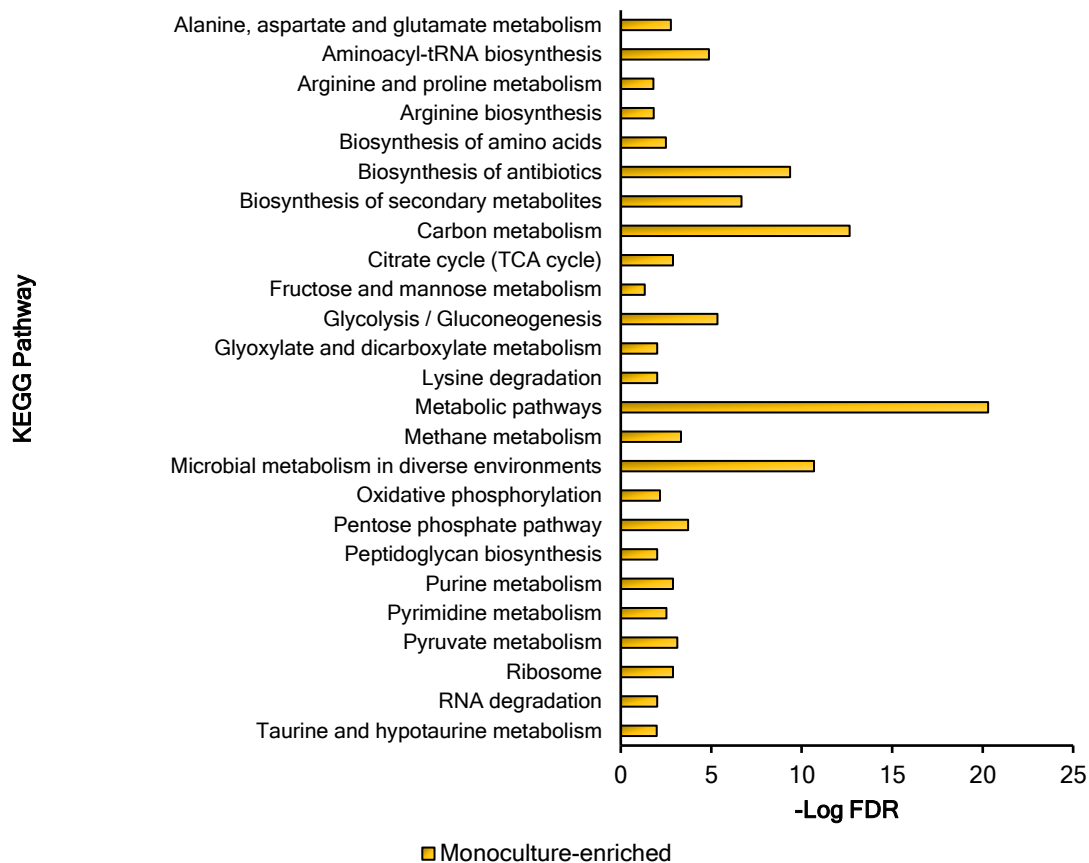

**Figure S10.** Geneset-based functional enrichment in monocultured vs. co-cultured *S. aureus* biofilm surfaceomes. The statistical assessment of KEGG pathway enrichment was carried out using the STRING database (Szklarczyk et al. 2019).

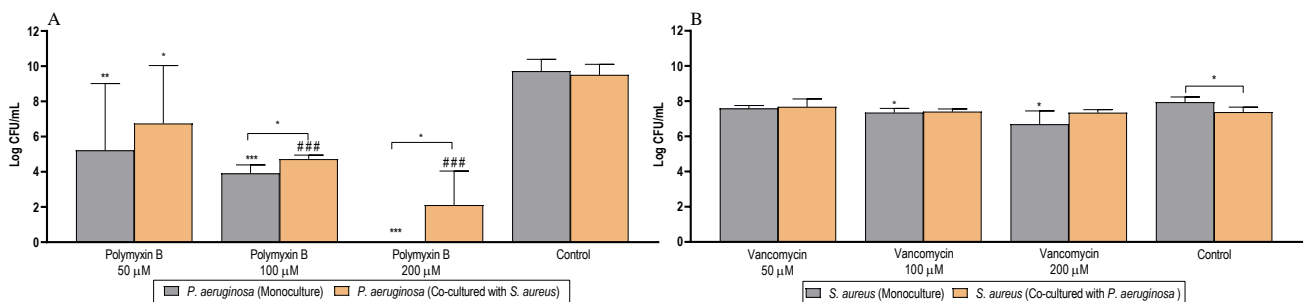

**Figure S11.** Viable counts of *P. aeruginosa* PAO1 (A) and *S. aureus* ATCC 25923 (B) biofilms after the treatment with different concentrations (50, 100 and  $\mu$ M) of polymyxin B (A) and vancomycin (B). Grey bars shows the viable counts (Log CFU/mL) of treated biofilms formed in monoculture, while orange bars presents corresponding data on biofilms formed in co-culture. “\*\*\*” indicates statistical difference to the control in monoculture (Student’s *t*-test; \*  $p < 0.05$ , \*\* $p < 0.01$ ; \*\*\*  $p < 0.001$ ), while “##” represents statistical difference to the control in co-culture (Student’s *t*-test; ###  $p < 0.001$ ). Results are expressed as the mean of three or more biological repetitions with their SD.

## 2 Supplementary Tables

**Table S1.** Cross-tabulation analysis of the association between predicted secretion mode\* and identification in the exoproteome or the surfaceome. The signal peptide-guided secretion pathways include the general secretory pathway (Sec), the twin-arginine translocation pathway (Tat) and the lipoprotein secretory pathway (Lipo). Non-classical secretion is additionally considered. The rows in the table represent the observed and expected counts of proteins in each category. Each subscript letter denotes a subset of secretion categories whose column proportions do not differ significantly from each other at the  $p$  0.05 level. \*Predicted secretion modes were obtained from SignalP 5.0 and SecretomeP 2.0 (Bendtsen et al., 2005; Almagro Armenteros et al., 2019)

|                                 |                      |                | Secretion      |                     |                    |                        |                    |                  |
|---------------------------------|----------------------|----------------|----------------|---------------------|--------------------|------------------------|--------------------|------------------|
|                                 |                      |                | None predicted | SP                  | TAT                | LIPO                   | Non-classical      |                  |
| Identified in the exoproteomes? | <i>P. aeruginosa</i> | Not identified | Count          | 3465 <sub>a</sub>   | 493 <sub>b</sub>   | 49 <sub>a, b</sub>     | 206 <sub>a</sub>   | 211 <sub>b</sub> |
|                                 |                      |                | Exp. count     | 3413                | 527                | 52                     | 195                | 237              |
|                                 |                      | Identified     | Count          | 819 <sub>a</sub>    | 168 <sub>b</sub>   | 16 <sub>a, b</sub>     | 39 <sub>a</sub>    | 87 <sub>b</sub>  |
|                                 |                      |                | Exp. count     | 871                 | 134                | 13                     | 50                 | 61               |
|                                 |                      | Total count    |                | 4284                | 661                | 65                     | 245                | 298              |
|                                 | <i>S. aureus</i>     | Not identified | Count          | 944 <sub>a, c</sub> | 90 <sub>c</sub>    | <5 <sub>a, b, c</sub>  | 61 <sub>a, b</sub> | 852 <sub>b</sub> |
|                                 |                      |                | Exp. count     | 1056                | 108                | n < 5                  | 56                 | 727              |
|                                 |                      | Identified     | Count          | 487 <sub>a, c</sub> | 56 <sub>c</sub>    | < 5 <sub>a, b, c</sub> | 15 <sub>a, b</sub> | 133 <sub>b</sub> |
|                                 |                      |                | Exp. count     | 375                 | 38                 | n < 5                  | 20                 | 258              |
|                                 |                      | Total count    |                | 1431                | 146                | < 5                    | 76                 | 985              |
| Identified in the surfaceomes?  | <i>P. aeruginosa</i> | Not identified | Count          | 3451 <sub>a</sub>   | 545 <sub>a</sub>   | 55 <sub>a</sub>        | 207 <sub>a</sub>   | 234 <sub>a</sub> |
|                                 |                      |                | Exp. count     | 3466                | 535                | 53                     | 198                | 241              |
|                                 |                      | Identified     | Count          | 833 <sub>a</sub>    | 116 <sub>a</sub>   | 10 <sub>a</sub>        | 38 <sub>a</sub>    | 64 <sub>a</sub>  |
|                                 |                      |                | Exp. count     | 819                 | 126                | 12                     | 47                 | 57               |
|                                 |                      | Total count    |                | 4284                | 661                | 65                     | 245                | 298              |
|                                 | <i>S. aureus</i>     | Not identified | Count          | 663 <sub>b</sub>    | 96 <sub>a, c</sub> | < 5 <sub>a, b, c</sub> | 44 <sub>a, b</sub> | 735 <sub>c</sub> |
|                                 |                      |                | Exp. count     | 835                 | 85                 | n < 5                  | 44                 | 574              |
|                                 |                      | Identified     | Count          | 768 <sub>b</sub>    | 50 <sub>a, c</sub> | < 5 <sub>a, b, c</sub> | 32 <sub>a, b</sub> | 250 <sub>c</sub> |
|                                 |                      |                | Exp. count     | 597                 | 61                 | n < 5                  | 32                 | 411              |
|                                 |                      | Total count    |                | 1431                | 146                | < 5                    | 76                 | 985              |



**Table S2.** The 10 most abundant protein species in *P. aeruginosa* mono- and co-culture exoproteomes. For the Gene Ontology (GO) annotations (The Gene Ontology Consortium 2017), only single function and cellular component are displayed where several are available. Predicted secretion modes\* include the general secretory pathway (Sec), the twin-arginine translocation pathway (Tat), the lipoprotein secretory pathway (Lipo) and non-classical (NC) secretion (O: none predicted). \*Predicted secretion modes were obtained from SignalP 5.0 and SecretomeP 2.0 (Bendtsen et al., 2005; Almagro Armenteros et al., 2019).

|                                              | Entry name       | Function                                                                | Gene   | GO biological process                                  | GO cellular component                 | Secretion |
|----------------------------------------------|------------------|-------------------------------------------------------------------------|--------|--------------------------------------------------------|---------------------------------------|-----------|
| <i>P. aeruginosa</i> monoculture exoproteome | ELAS_PSEA<br>E   | Elastase LasB                                                           | lasB   | bacterial-type flagellum-dependent swarming motility   | extracellular region                  | Sec       |
|                                              | Q9HY81_PSE<br>AE | Probable peroxidase                                                     | PA3529 | cell redox homeostasis                                 | cytosol                               | O         |
|                                              | ETFB_PSEA<br>E   | Electron transfer flavoprotein subunit beta                             | etfB   |                                                        | cytosol                               | NC        |
|                                              | Q9HUD3_PS<br>EAE | Malic enzyme                                                            | PA5046 |                                                        |                                       | O         |
|                                              | DLDH2_PSE<br>AE  | Dihydrolipoyl dehydrogenase                                             | lpdG   | cell redox homeostasis                                 | cytoplasm                             | O         |
|                                              | AZUR_PSEA<br>E   | Azurin                                                                  | azu    | oxidation-reduction process                            | periplasmic space                     | Sec       |
|                                              | SUCD_PSEA<br>E   | Succinate--CoA ligase [ADP-forming] subunit alpha                       | sucD   | nucleoside triphosphate biosynthetic process           | cytosol                               | O         |
|                                              | BRAC_PSEA<br>E   | Leucine-, isoleucine-, valine-, threonine-, and alanine-binding protein | braC   | branched-chain amino acid transport                    | periplasmic space                     | Sec       |
|                                              | ETFA_PSEA<br>E   | Electron transfer flavoprotein subunit alpha                            | etfA   | fatty acid beta-oxidation using acyl-CoA dehydrogenase |                                       | NC        |
|                                              | G3XD47_PSE<br>AE | Arginine/ornithine binding protein AotJ                                 | aotJ   | L-arginine import across plasma membrane               | extracellular space                   | Sec       |
| <i>P. aeruginosa</i> co-culture exoproteome  | ELAS_PSEA<br>E   | Elastase LasB                                                           | lasB   | bacterial-type flagellum-dependent swarming motility   | extracellular region                  | Sec       |
|                                              | FLID2_PSEA<br>E  | B-type flagellar hook-associated protein 2                              | fliD   | bacterial-type flagellum-dependent cell motility       | bacterial-type flagellum filament cap | NC        |
|                                              | AZUR_PSEA<br>E   | Azurin                                                                  | azu    | oxidation-reduction process                            | periplasmic space                     | Sec       |
|                                              | FLICB_PSEA<br>E  | B-type flagellin                                                        | fliC   | bacterial-type flagellum-dependent cell motility       | bacterial-type flagellum filament     | NC        |
|                                              | LASA_PSEA<br>E   | Staphylolytic protease LasA                                             | lasA   | pathogenesis                                           | extracellular space                   | Sec       |
|                                              | Q9HY81_PSE<br>AE | Probable peroxidase                                                     | PA3529 | cell redox homeostasis                                 | cytosol                               | O         |
|                                              | G3XD39_PSE<br>AE | Probable bacteriophage protein                                          | PA0622 |                                                        |                                       | NC        |
|                                              | Q9I5S9_PSE<br>AE | Probable bacteriophage protein                                          | PA0623 |                                                        |                                       | NC        |
|                                              | Q9I4N7_PSE<br>AE | Flagellar protein FlaG                                                  | PA1093 |                                                        |                                       | NC        |
|                                              | SUCD_PSEA<br>E   | Succinate--CoA ligase [ADP-forming] subunit alpha                       | sucD   | nucleoside triphosphate biosynthetic process           | cytosol                               | O         |

**Table S3.** The 10 most abundant protein species in *S. aureus* mono- and co-culture exoproteomes. For the Gene Ontology (GO) annotations (The Gene Ontology Consortium 2017), only single function and cellular component are displayed where several are available. Predicted secretion modes include the general secretory pathway (Sec), the twin-arginine translocation pathway (Tat), the lipoprotein secretory pathway (Lipo) and non-classical (NC) secretion (O: none available). \*Predicted secretion modes were obtained from SignalP 5.0 and SecretomeP 2.0 (Bendtsen et al., 2005;Almagro Armenteros et al., 2019).

|                                                 | Entry name         | Function                                         | Gene   | GO biological process                          | GO cellular component          | Secretion |
|-------------------------------------------------|--------------------|--------------------------------------------------|--------|------------------------------------------------|--------------------------------|-----------|
| <b><i>S. aureus</i> monoculture exoproteome</b> | WP_00012941<br>3.1 | arginine deiminase                               | arcA   | arginine catabolic process to ornithine        | cytoplasm                      | O         |
|                                                 | WP_00013615<br>9.1 | ornithine carbamoyltransferase ArcB              | arcB   | arginine biosynthetic process                  | cytoplasm                      | O         |
|                                                 | WP_00075126<br>5.1 | transglycosylase IsaA                            | isaA   | metabolic process                              | extracellular region           | Sec       |
|                                                 | WP_00027941<br>4.1 | glyceraldehyde-3-phosphate dehydrogenase 1       | gapA   | glycolytic process                             | cell wall                      | O         |
|                                                 | WP_00063417<br>5.1 | universal stress protein UspA                    | uspA_2 | response to stress                             | cytoplasm                      | O         |
|                                                 | WP_00107452<br>1.1 | bifunctional autolysin Atl                       | atl    | peptidoglycan catabolic process                |                                | Sec       |
|                                                 | WP_00006817<br>6.1 | pyruvate dehydrogenase E1 component subunit beta | pdhB   | glycolytic process                             |                                | O         |
|                                                 | WP_00079256<br>7.1 | immunoglobulin-binding protein sbi               | sbi    | pathogenesis                                   | extracellular region           | Sec       |
|                                                 | WP_00048143<br>8.1 | transketolase                                    | tkt    | pentose-phosphate shunt                        |                                | NC        |
|                                                 | WP_00103140<br>7.1 | class I fructose-bisphosphate aldolase           | fda    | glycolytic process                             |                                | O         |
| <b><i>S. aureus</i> co-culture exoproteome</b>  | WP_00013615<br>9.1 | ornithine carbamoyltransferase ArcB              | arcB   | arginine biosynthetic process                  | cytoplasm                      | O         |
|                                                 | WP_00012941<br>3.1 | arginine deiminase                               | arcA   | arginine catabolic process to ornithine        | cytoplasm                      | O         |
|                                                 | WP_00027941<br>4.1 | glyceraldehyde-3-phosphate dehydrogenase 1       | gapA   | NADH regeneration                              | cell wall                      | O         |
|                                                 | WP_00003471<br>6.1 | molecular chaperone DnaK                         | dnaK   | chaperone cofactor-dependent protein refolding | cytoplasm                      | NC        |
|                                                 | WP_00113184<br>1.1 | fructose-bisphosphate aldolase                   | fba    | glycolytic process                             |                                | O         |
|                                                 | WP_00126146<br>0.1 | 30S ribosomal protein S6                         | rpsF   | translation                                    | ribosome                       | O         |
|                                                 | WP_00048143<br>8.1 | transketolase                                    | tkt    | pentose-phosphate shunt                        |                                | NC        |
|                                                 | WP_00107452<br>1.1 | bifunctional autolysin Atl                       | atl    | peptidoglycan catabolic process                |                                | Sec       |
|                                                 | WP_00063417<br>5.1 | universal stress protein UspA                    | uspA_2 | response to stress                             | cytoplasm                      | O         |
|                                                 | WP_00157455<br>6.1 | Thermonuclease Nuc                               | nuc    | pathogenesis                                   | integral component of membrane | Sec       |

**Table S4.** The 10 most abundant protein species in *P. aeruginosa* mono- and co-culture surfaceomes. For the Gene Ontology (GO) annotations (The Gene Ontology Consortium 2017), only single function and cellular component are displayed where several are available. Predicted secretion modes include the general secretory pathway (Sec), the twin-arginine translocation pathway (Tat), the lipoprotein secretory pathway (Lipo) and non-classical (NC) secretion (O: none available). \*Predicted secretion modes were obtained from SignalP 5.0 and SecretomeP 2. (Bendtsen et al., 2005;Almagro Armenteros et al., 2019).

| Entry name                                  | Function         | Gene                                                                                             | GO biological process | GO cellular component                                     | Secretion                             |     |
|---------------------------------------------|------------------|--------------------------------------------------------------------------------------------------|-----------------------|-----------------------------------------------------------|---------------------------------------|-----|
| <i>P. aeruginosa</i> monoculture surfaceome | Q9HUC3_PS<br>EAE | Polyhydroxyalkanoate synthesis protein PhaF                                                      | phaF                  |                                                           |                                       | NC  |
|                                             | Q9I4Z7_PSE<br>AE | DNA-binding protein from starved cells Dps                                                       | PA0962                | cellular iron ion homeostasis                             | cell                                  | O   |
|                                             | Q9I031_PSE<br>AE | Probable ATP-binding component of ABC transporter                                                | PA2812                |                                                           |                                       | O   |
|                                             | Q9HUY5_PS<br>EAE | Mg(2+) transport ATPase, P-type 2                                                                | mgtA                  |                                                           | integral component of plasma membrane | O   |
|                                             | Q9I5U9_PSE<br>AE | PrkA AAA domain protein                                                                          | PA0588                |                                                           |                                       | O   |
|                                             | Q9I2R2_PSE<br>AE | Probable oxidoreductase                                                                          | PA1833                |                                                           |                                       | O   |
|                                             | MASZ_PSEA<br>E   | Malate synthase G                                                                                | glcB                  | glyoxylate catabolic process                              | cytosol                               | O   |
|                                             | G3XD52_PS<br>EAE | (R)-specific enoyl-CoA hydratase                                                                 | PA3302                | fatty acid biosynthetic process                           | fatty acid synthase complex           | O   |
|                                             | PHZM_PSEA<br>E   | Phenazine-1-carboxylate N-methyltransferase                                                      | phzM                  |                                                           |                                       | O   |
|                                             | Q9HTL9_PSE<br>AE | Enamine/imine deaminase                                                                          | PA5339                | organonitrogen compound catabolic process                 | cytosol                               | O   |
| <i>P. aeruginosa</i> co-culture surfaceome  | ATPB_PSEA<br>E   | ATP synthase subunit beta                                                                        | atpD                  | ATP synthesis coupled proton transport                    | plasma membrane                       | O   |
|                                             | RL2_PSEAE        | 50S ribosomal protein L2                                                                         | rplB                  | cytoplasmic translation                                   | cytosolic large ribosomal subunit     | NC  |
|                                             | ODO2_PSEA<br>E   | Dihydrolipoylysine-residue succinyltransferase component of 2-oxoglutarate dehydrogenase complex | sucB                  | L-lysine catabolic process to acetyl-CoA via saccharopine | oxoglutarate dehydrogenase complex    | O   |
|                                             | DSBA_PSEA<br>E   | Thiol:disulfide interchange protein DsbA                                                         | dsbA                  | cell redox homeostasis                                    | periplasmic space                     | Sec |
|                                             | ALGP_PSEA<br>E   | Transcriptional regulatory protein AlgP                                                          | algP                  | alginate biosynthetic process                             |                                       | NC  |
|                                             | Q9I4Z7_PSE<br>AE | DNA-binding protein from starved cells Dps                                                       | PA0962                | cellular iron ion homeostasis                             | cell                                  | O   |
|                                             | Q9HX76_PS<br>EAE | Probable DNA binding protein                                                                     | PA3940                |                                                           | cytosol                               | O   |
|                                             | G3XD14_PS<br>EAE | RNA polymerase-binding transcription factor DksA                                                 | dksA                  | negative regulation of lipid biosynthetic process         | cytoplasm                             | O   |
|                                             | Q9I4I2_PSEA<br>E | Ribonucleoside-diphosphate reductase subunit beta                                                | nrdB                  | deoxyribonucleotide biosynthetic process                  | integral component of membrane        | O   |
|                                             | Q9I0H9_PSE<br>AE | Peptidase                                                                                        | PA2659                |                                                           |                                       | Sec |

**Table S5.** The 10 most abundant protein species in *S. aureus* mono- and co-culture surfaceomes. For the Gene Ontology (GO) annotations (The Gene Ontology Consortium 2017), only single function and cellular component are displayed where several are available. Predicted secretion modes include the general secretory pathway (Sec), the twin-arginine translocation pathway (Tat), the lipoprotein secretory pathway (Lipo) and non-classical (NC) secretion (O: none available). \*Predicted secretion modes were obtained from SignalP 5.0 and SecretomeP 2.0 (Bendtsen et al., 2005;Almagro Armenteros et al., 2019).

| Entry name     | Function                                                                                 | Gene | GO biological process                   | GO cellular component                      | Secretion |
|----------------|------------------------------------------------------------------------------------------|------|-----------------------------------------|--------------------------------------------|-----------|
| WP_000825534.1 | methionine ABC transporter substrate-binding protein                                     | gmpC |                                         |                                            | Lipo      |
| WP_000129413.1 | arginine deiminase                                                                       | arcA | arginine catabolic process to ornithine | cytoplasm                                  | O         |
| WP_000279414.1 | glyceraldehyde-3-phosphate dehydrogenase 1                                               | gapA | NADH regeneration                       | cell wall                                  | O         |
| WP_001218603.1 | aerobic glycerol-3-phosphate dehydrogenase                                               | glpD | glycerol catabolic process              | glycerol-3-phosphate dehydrogenase complex | NC        |
| WP_001131841.1 | fructose-bisphosphate aldolase                                                           | fba  | glycolytic process                      |                                            | O         |
| WP_000511135.1 | ATP synthase subunit beta                                                                | atpD | ATP synthesis coupled proton transport  | plasma membrane                            | O         |
| WP_000068176.1 | pyruvate dehydrogenase E1 component subunit beta                                         | pdhB | glycolytic process                      |                                            | O         |
| WP_000210828.1 | serine/threonine dehydratase                                                             | tdcB | L-serine catabolic process              |                                            | O         |
| WP_000034716.1 | molecular chaperone DnaK                                                                 | dnaK | cellular response to unfolded protein   | cytoplasm                                  | NC        |
| WP_001043863.1 | DNA-binding protein HU                                                                   | hup  | chromosome condensation                 |                                            | O         |
| WP_000863437.1 | dihydropolyllysine-residue acetyltransferase component of pyruvate dehydrogenase complex | pdhC | glycolytic process                      |                                            | O         |
| WP_000129413.1 | arginine deiminase                                                                       | arcA | arginine catabolic process to ornithine | cytoplasm                                  | O         |
| WP_001130051.1 | malate:quinone oxidoreductase                                                            | mqo  | tricarboxylic acid cycle                | cytoplasm                                  | O         |
| WP_000268484.1 | 30S ribosomal protein S2                                                                 | rpsB | translation                             | small ribosomal subunit                    | O         |
| WP_000127572.1 | trigger factor                                                                           | tig  | cell cycle                              | cytoplasm                                  | O         |
| WP_000279414.1 | glyceraldehyde-3-phosphate dehydrogenase 1                                               | gapA | NADH regeneration                       | cell wall                                  | O         |
| WP_000133953.1 | 30S ribosomal protein S1                                                                 | rpsA |                                         | ribosome                                   | O         |
| WP_000858795.1 | asparagine--tRNA ligase                                                                  | asnS | asparaginyl-tRNA aminoacylation         | cytoplasm                                  | O         |
| WP_000457386.1 | 50S ribosomal protein L21                                                                | rplU | translation                             | ribosome                                   | O         |
| WP_000035325.1 | pyruvate dehydrogenase E1 component subunit alpha                                        | pdhA | glycolytic process                      |                                            | O         |

**Table S6:** Differences in *P. aeruginosa* protein abundance (Student's *t*-test, FDR 0.15) in co-culture vs. monoculture exoproteome.

| Entry name   | Protein function                                                                        | STRING ID | Log <sub>2</sub> ΔLFQ | q value |
|--------------|-----------------------------------------------------------------------------------------|-----------|-----------------------|---------|
| Q9I4N7_PSEAE | Flagellar protein FlaG                                                                  | flaG      | 5.2                   | 0.0108  |
| G3XCX2_PSEAE | Phage tail assembly protein                                                             | DR97_3594 | 4.8                   | 0.0280  |
| Q9HYP5_PSEAE | FlgM                                                                                    | flgM      | 4.5                   | 0.0296  |
| Q9I5S9_PSEAE | Probable bacteriophage protein                                                          | gpFII     | 4.5                   | 0.0475  |
| Q9HUD6_PSEAE | Putative secreted protein                                                               | DR97_2388 | 4.3                   | 0.0312  |
| G3XD39_PSEAE | Probable bacteriophage protein                                                          | gpFI      | 3.9                   | 0.0286  |
| Q9I613_PSEAE | Uncharacterized protein                                                                 | DR97_3473 | 3.6                   | 0.0279  |
| G3XD68_PSEAE | Phage_TAC_13 domain-containing protein                                                  | #N/A      | 3.6                   | 0.0264  |
| Q9I5F6_PSEAE | Bifunctional protein PutA                                                               | putA      | 3.6                   | 0.0702  |
| HCP1_PSEAE   | Protein hcp1                                                                            | hcp1      | 3.5                   | 0.0980  |
| Q9HXV6_PSEAE | Uncharacterized protein                                                                 | DR97_4193 | 3.5                   | 0.0330  |
| G3XCX5_PSEAE | Probable bacteriophage protein                                                          | J         | 3.4                   | 0.0165  |
| RECA_PSEAE   | Protein RecA (Recombinase A)                                                            | recA      | 3.4                   | 0.0335  |
| G3XD38_PSEAE | Putative major tail protein V                                                           | #N/A      | 3.2                   | 0.1283  |
| ODO2_PSEAE   | Dihydroliipoamide succinyltransferase component of 2-oxoglutarate dehydrogenase complex | sucB      | 3.1                   | 0.0303  |
| RL2_PSEAE    | 50S ribosomal protein L2                                                                | rplB      | 2.9                   | 0.0381  |
| Q9HUA1_PSEAE | Probable binding protein component of ABC transporter                                   | gltI1     | 2.9                   | 0.0114  |
| G3XD71_PSEAE | Probable bacteriophage protein                                                          | DR97_3590 | 2.9                   | 0.0295  |
| FLID2_PSEAE  | B-type flagellar hook-associated protein 2                                              | fliD      | 2.9                   | 0.0412  |
| Q9I4P3_PSEAE | Flagellar hook-associated protein 1 FlgK                                                | flgK      | 2.8                   | 0.0524  |
| Q9I130_PSEAE | Putative ferric enterobactin esterase                                                   | DR97_5981 | 2.8                   | 0.0298  |
| G3XDA6_PSEAE | Repressor, PtrB                                                                         | DR97_3582 | 2.6                   | 0.0272  |
| FLICB_PSEAE  | B-type flagellin                                                                        | fliC      | 2.6                   | 0.1034  |
| Q9I4P2_PSEAE | Flagellar hook-associated protein type 3 FlgL                                           | flgL      | 2.6                   | 0.0938  |
| PILY1_PSEAE  | Type IV pilus biogenesis factor PilY1                                                   | pilY1     | 2.6                   | 0.0901  |
| Q9I3D3_PSEAE | 2-oxoglutarate dehydrogenase (E1 subunit)                                               | sucA      | 2.5                   | 0.0394  |
| Q9I5D1_PSEAE | AmpDh3                                                                                  | amiD_2    | 2.5                   | 0.0000  |
| Q9I129_PSEAE | Lipoprotein                                                                             | DR97_5980 | 2.5                   | 0.0987  |
| LASA_PSEAE   | Staphylolytic protease LasA                                                             | lasA      | 2.4                   | 0.0458  |
| CARB_PSEAE   | Carbamoyl-phosphate synthase large chain                                                | carB      | 2.3                   | 0.0155  |
| RL20_PSEAE   | 50S ribosomal protein L20                                                               | rplT      | 2.3                   | 0.0686  |
| RL5_PSEAE    | 50S ribosomal protein L5                                                                | rplE      | 2.3                   | 0.0806  |
| Q9HYZ6_PSEAE | Site-determining protein                                                                | minD      | 2.2                   | 0.0287  |
| G3XD55_PSEAE | Type 4 fimbrial biogenesis protein PilY2                                                | pilY2     | 2.2                   | 0.0311  |
| RL31_PSEAE   | 50S ribosomal protein L31                                                               | DR97_2404 | 2.1                   | 0.1141  |
| RL29_PSEAE   | 50S ribosomal protein L29                                                               | rpmC      | 2.1                   | 0.0991  |
| RS8_PSEAE    | 30S ribosomal protein S8                                                                | rpsH      | 2.0                   | 0.1443  |
| Q9I131_PSEAE | Uncharacterized protein                                                                 | DR97_5981 | 2.0                   | 0.0299  |
| Q9I4I1_PSEAE | Ribonucleoside-diphosphate reductase                                                    | nrdA      | 1.9                   | 0.0829  |
| Q9I3Q6_PSEAE | Flagellar hook-length control protein FlkK                                              | DR97_582  | 1.8                   | 0.0373  |
| RHO_PSEAE    | Transcription termination factor Rho                                                    | rho       | 1.8                   | 0.1433  |
| RISB_PSEAE   | 6,7-dimethyl-8-ribityllumazine synthase                                                 | ribH      | 1.7                   | 0.0165  |
| Q9HYU8_PSEAE | Probable HIT family protein                                                             | DR97_4635 | 1.7                   | 0.0162  |
| Q9I4P9_PSEAE | Flagellar hook protein FlgE                                                             | flgE      | 1.7                   | 0.0332  |
| ATPD_PSEAE   | ATP synthase subunit delta                                                              | atpH      | 1.7                   | 0.0721  |
| Q9HXM5_PSEAE | Inosine-5'-monophosphate dehydrogenase                                                  | guaB      | 1.6                   | 0.0456  |
| KDSB_PSEAE   | 3-deoxy-manno-octulosonate cytidyltransferase                                           | kdsB      | 1.5                   | 0.0282  |
| Q9HZM8_PSEAE | Ribonuclease E                                                                          | rne       | 1.5                   | 0.0218  |
| Q9HYJ2_PSEAE | DNA damage-inducible protein YebG                                                       | DR97_4509 | 1.5                   | 0.0419  |
| GLN1B_PSEAE  | Glutamine synthetase                                                                    | glnA      | 1.5                   | 0.0321  |
| ATPE_PSEAE   | ATP synthase epsilon chain                                                              | atpC      | 1.5                   | 0.0333  |
| Q9HW32_PSEAE | Insulin-cleaving metalloproteinase outer membrane protein                               | icmP      | 1.5                   | 0.0387  |
| Q9I4I2_PSEAE | Ribonucleoside-diphosphate reductase subunit beta                                       | nrdB      | 1.4                   | 0.1165  |
| RS16_PSEAE   | 30S ribosomal protein S16                                                               | rpsP      | 1.3                   | 0.0997  |
| RL4_PSEAE    | 50S ribosomal protein L4                                                                | rplD      | 1.3                   | 0.0282  |
| Q9I5S8_PSEAE | Probable bacteriophage protein                                                          | #N/A      | 1.3                   | 0.0746  |
| Q9HW15_PSEAE | Probable short-chain dehydrogenase                                                      | speA3     | 1.2                   | 0.1037  |
| Q9HV16_PSEAE | Glycerophosphodiester phosphodiesterase                                                 | DR97_2136 | 1.2                   | 0.0705  |
| MAO1_PSEAE   | NAD-dependent malic enzyme                                                              | maeA      | 1.2                   | 0.0209  |
| Q9I5E2_PSEAE | 2-methylisocitrate lyase                                                                | prpB      | 1.2                   | 0.0377  |
| G3XD20_PSEAE | Periplasmic serine endoprotease DegP-like                                               | mucD      | 1.2                   | 0.1240  |
| ALR2_PSEAE   | Alanine racemase, catabolic                                                             | dadX      | 1.2                   | 0.0269  |
| Q9I5E4_PSEAE | Probable aconitate hydratase                                                            | acnD      | 1.1                   | 0.0980  |
| ODBB_PSEAE   | 2-oxoisovalerate dehydrogenase subunit beta                                             | bkdA2     | 1.1                   | 0.0300  |
| STHA_PSEAE   | Soluble pyridine nucleotide transhydrogenase                                            | sthA      | 1.1                   | 0.0373  |
| ILVC_PSEAE   | Ketol-acid reductoisomerase (NADP(+))                                                   | ilvC      | 1.0                   | 0.0267  |
| ATPB_PSEAE   | ATP synthase subunit beta                                                               | atpD      | 1.0                   | 0.0397  |
| Q9HX39_PSEAE | Uncharacterized protein conserved in bacteria                                           | DR97_3886 | 1.0                   | 0.0309  |
| HLDE_PSEAE   | Bifunctional protein HldE                                                               | hldE      | 1.0                   | 0.0696  |
| Q9I6H5_PSEAE | D-3-phosphoglycerate dehydrogenase                                                      | serA      | 0.9                   | 0.0842  |
| Q9I5V9_PSEAE | Glutamyl-tRNA amidotransferase                                                          | DR97_3547 | 0.9                   | 0.1490  |
| LAP_PSEAE    | Leucine aminopeptidase                                                                  | DR97_5001 | 0.8                   | 0.0431  |
| RIBB_PSEAE   | 3,4-dihydroxy-2-butanone 4-phosphate synthase                                           | ribB      | 0.8                   | 0.1323  |
| HIS7_PSEAE   | Imidazoleglycerol-phosphate dehydratase                                                 | hisB      | 0.8                   | 0.1295  |
| DADA1_PSEAE  | D-amino acid dehydrogenase 1                                                            | dadA1     | 0.8                   | 0.0293  |
| Y3453_PSEAE  | UPF0502 protein PA3453                                                                  | DR97_4468 | 0.6                   | 0.1078  |

## Supplementary Material

| Entry name   | Protein function                                                   | STRING ID | Log <sub>2</sub> ΔLFQ | q value |
|--------------|--------------------------------------------------------------------|-----------|-----------------------|---------|
| FABV_PSEAE   | Enoyl-[acyl-carrier-protein] reductase [NADH]                      | fabV      | 0.5                   | 0.1299  |
| Q9HY50_PSEAE | Zinc-type alcohol dehydrogenase-like protein                       | DR97_4372 | 0.5                   | 0.1483  |
| Q9HVA8_PSEAE | Ferric iron-binding periplasmic protein HitA                       | fbpA      | 0.4                   | 0.1293  |
| SYM_PSEAE    | Methionine--tRNA ligase                                            | metG      | 0.4                   | 0.1426  |
| Q9HT52_PSEAE | Probable short-chain dehydrogenase                                 | tsaC1     | -0.5                  | 0.1152  |
| PQSE_PSEAE   | 2-aminobenzoylacetyl-CoA thioesterase                              | dfa3      | -0.5                  | 0.1297  |
| DAPD_PSEAE   | 2,3,4,5-tetrahydropyridine-2,6-dicarboxylate N-succinyltransferase | dapD      | -0.6                  | 0.1318  |
| Q9HW72_PSEAE | Pyruvate kinase                                                    | pykA      | -0.6                  | 0.0135  |
| DHOM_PSEAE   | Homoserine dehydrogenase                                           | hom       | -0.6                  | 0.0830  |
| Y1579_PSEAE  | Uncharacterized protein PA1579                                     | DR97_355  | -0.6                  | 0.0806  |
| Q9HVA1_PSEAE | Acetolactate synthase isozyme III small subunit                    | ilvN      | -0.6                  | 0.0366  |
| MURA_PSEAE   | UDP-N-acetylglucosamine 1-carboxyvinyltransferase                  | murA      | -0.6                  | 0.1058  |
| T230_PSEAE   | Tryptophan 2,3-dioxygenase                                         | kynA      | -0.6                  | 0.1167  |
| SUCD_PSEAE   | Succinate--CoA ligase [ADP-forming] subunit alpha                  | sucD      | -0.7                  | 0.0663  |
| Q9I2R7_PSEAE | Probable short-chain dehydrogenase                                 | fabG_17   | -0.7                  | 0.0369  |
| Q9HX51_PSEAE | Probable transcriptional regulator                                 | DR97_3901 | -0.7                  | 0.1317  |
| Q9HXR8_PSEAE | Probable FMN oxidoreductase                                        | namA      | -0.7                  | 0.0560  |
| P5217_PSEAE  | Probable binding protein component of ABC iron transporter PA5217  | DR97_2586 | -0.7                  | 0.0664  |
| Q9I3W1_PSEAE | Putative secreted protein                                          | DR97_640  | -0.7                  | 0.0309  |
| Q9HW87_PSEAE | Formyltetrahydrofolate deformylase                                 | purU      | -0.7                  | 0.1290  |
| ASTD_PSEAE   | N-succinylglutamate 5-semialdehyde dehydrogenase                   | astD      | -0.8                  | 0.0284  |
| Q9I2W9_PSEAE | Phosphoenolpyruvate synthase                                       | ppsA      | -0.8                  | 0.0501  |
| Q9I0T2_PSEAE | Probable acyl-CoA dehydrogenase                                    | mmgC3     | -0.8                  | 0.1428  |
| Q9HT66_PSEAE | Cysteine hydrolase                                                 | DR97_2885 | -0.8                  | 0.0270  |
| ALR1_PSEAE   | Alanine racemase, biosynthetic                                     | DR97_2281 | -0.8                  | 0.0775  |
| Q9HYR6_PSEAE | Condensation domain protein                                        | DR97_4598 | -0.8                  | 0.1323  |
| GLYA2_PSEAE  | Serine hydroxymethyltransferase 2                                  | glyA3     | -0.8                  | 0.1486  |
| Q9HTD1_PSEAE | Probable transcarboxylase subunit                                  | oadA      | -0.9                  | 0.0666  |
| Q9I067_PSEAE | Putative oxidoreductase                                            | puuB1     | -0.9                  | 0.1421  |
| SYV_PSEAE    | Valine--tRNA ligase                                                | valS      | -0.9                  | 0.0588  |
| NUOCD_PSEAE  | NADH-quinone oxidoreductase subunit C/D                            | nuoD      | -0.9                  | 0.0994  |
| G3XDA5_PSEAE | Anaerobically-induced outer membrane porin OprE                    | oprE      | -0.9                  | 0.0424  |
| PCKA_PSEAE   | Phosphoenolpyruvate carboxykinase (ATP)                            | pckA      | -0.9                  | 0.0395  |
| NADA_PSEAE   | Quinolinate synthase A                                             | nadA      | -0.9                  | 0.1403  |
| AROB_PSEAE   | 3-dehydroquinate synthase                                          | aroB      | -0.9                  | 0.1020  |
| FABA_PSEAE   | 3-hydroxydecanoyl-[acyl-carrier-protein] dehydratase FabA          | fabA      | -0.9                  | 0.0691  |
| Q9I4Z7_PSEAE | Probable dna-binding stress protein                                | dps2      | -0.9                  | 0.0300  |
| LEU1_PSEAE   | 2-isopropylmalate synthase                                         | leuA      | -1.0                  | 0.0403  |
| RECR_PSEAE   | Recombination protein RecR                                         | recR      | -1.0                  | 0.1000  |
| Q9I1S0_PSEAE | NADP-dependent oxidoreductase                                      | curA      | -1.0                  | 0.0966  |
| AAT_PSEAE    | Aspartate aminotransferase (AspAT)                                 | aspC      | -1.0                  | 0.0526  |
| Q9HZH0_PSEAE | Probable porin                                                     | opdQ      | -1.0                  | 0.0624  |
| Y329_PSEAE   | UPF0339 protein PA0329                                             | DR97_3294 | -1.0                  | 0.0450  |
| AROE_PSEAE   | Shikimate dehydrogenase (NADP(+))                                  | aroE      | -1.0                  | 0.1492  |
| Q9HVV9_PSEAE | 3-deoxy-D-manno-octulosonate 8-phosphate phosphatase KdsC          | DR97_1637 | -1.0                  | 0.1164  |
| Y3808_PSEAE  | Uncharacterized protein PA3808                                     | iscX      | -1.0                  | 0.1198  |
| Q9HXG8_PSEAE | ABC transporter substrate-binding protein                          | DR97_4030 | -1.0                  | 0.0267  |
| METH_PSEAE   | Methionine synthase                                                | metH      | -1.0                  | 0.0410  |
| GLO2_PSEAE   | Hydroxyacylglutathione hydrolase (Glyoxalase II)                   | gloB      | -1.0                  | 0.0951  |
| Q9HY81_PSEAE | Probable peroxidase                                                | tsaA      | -1.0                  | 0.0304  |
| Q9I5A7_PSEAE | Inner membrane lipoprotein YiaD                                    | yiaD_1    | -1.0                  | 0.0473  |
| Q9I5A8_PSEAE | Beta-lactamase                                                     | ycbL      | -1.0                  | 0.1490  |
| DAPB_PSEAE   | 4-hydroxy-tetrahydrodipicolinate reductase                         | dapB      | -1.0                  | 0.0325  |
| Q9HZ15_PSEAE | Probable transcriptional regulator                                 | DR97_4710 | -1.1                  | 0.0602  |
| Q9I2F4_PSEAE | Ribokinase                                                         | rbkK      | -1.1                  | 0.0689  |
| Q9I083_PSEAE | Probable outer membrane protein                                    | oprD3     | -1.1                  | 0.0566  |
| HCNB_PSEAE   | Hydrogen cyanide synthase subunit HcnB                             | DR97_6236 | -1.1                  | 0.0730  |
| Q9I348_PSEAE | Cysteine hydrolase                                                 | DR97_211  | -1.1                  | 0.0301  |
| PGK_PSEAE    | Phosphoglycerate kinase                                            | pgk       | -1.1                  | 0.0411  |
| ARGC_PSEAE   | N-acetyl-gamma-glutamyl-phosphate reductase                        | argC      | -1.1                  | 0.0285  |
| ETFB_PSEAE   | Electron transfer flavoprotein subunit beta                        | etfB      | -1.1                  | 0.0364  |
| ASPQ_PSEAE   | Glutaminase-asparaginase                                           | ansB      | -1.1                  | 0.0345  |
| TPIS_PSEAE   | Triosephosphate isomerase                                          | tpiA      | -1.1                  | 0.1212  |
| Q9HVV4_PSEAE | ABC transporter periplasmic binding protein MlaC                   | ttg2D     | -1.1                  | 0.1320  |
| Q9I746_PSEAE | Putative secretion protein                                         | DR97_3043 | -1.1                  | 0.1021  |
| Q9I765_PSEAE | Oligopeptidase A                                                   | prlC      | -1.1                  | 0.0278  |
| Q9HVS3_PSEAE | Probable metallopeptidase                                          | pepQ      | -1.2                  | 0.1316  |
| Q9HXY0_PSEAE | Probable aminotransferase                                          | dapC      | -1.2                  | 0.0405  |
| ETFA_PSEAE   | Electron transfer flavoprotein subunit alpha                       | etfA      | -1.2                  | 0.0126  |
| DAVT_PSEAE   | 5-aminovaleate aminotransferase DavT                               | gabT      | -1.2                  | 0.0325  |
| OADC_PSEAE   | Oxaloacetate decarboxylase                                         | bcpA      | -1.2                  | 0.0077  |
| GSHB_PSEAE   | Glutathione synthetase                                             | gshB      | -1.2                  | 0.0311  |
| Q9HVU6_PSEAE | (R)-stereoselective amidase                                        | DR97_1654 | -1.2                  | 0.0582  |
| DLDH2_PSEAE  | Dihydrolipoyl dehydrogenase                                        | lpd       | -1.2                  | 0.0291  |
| Q9I3L9_PSEAE | Sulfate-binding protein of ABC transporter                         | sbp3      | -1.2                  | 0.0379  |
| ILVE_PSEAE   | Branched-chain-amino-acid aminotransferase                         | ilvE      | -1.2                  | 0.0434  |
| Q9I4C2_PSEAE | Class I SAM-dependent methyltransferase                            | DR97_718  | -1.2                  | 0.0758  |
| Q9HW68_PSEAE | Fumarate hydratase class I                                         | fumA      | -1.2                  | 0.0692  |
| SPUD_PSEAE   | Putrescine-binding periplasmic protein SpuD                        | potF1     | -1.2                  | 0.0274  |
| Q14T74_PSEAE | Putative NAD(P) transhydrogenase, subunit alpha part 1             | pntAA     | -1.2                  | 0.0281  |

| Entry name   | Protein function                                                                                      | STRING ID | Log <sub>2</sub> ΔLFQ | q value |
|--------------|-------------------------------------------------------------------------------------------------------|-----------|-----------------------|---------|
| Q9HUD3_PSEAE | Malic enzyme                                                                                          | maeB      | -1.2                  | 0.0302  |
| AROQ1_PSEAE  | 3-dehydroquininate dehydratase 1                                                                      | aroQ1     | -1.2                  | 0.0300  |
| PDXA_PSEAE   | 4-hydroxythreonine-4-phosphate dehydrogenase                                                          | pdxA      | -1.3                  | 0.0778  |
| Q9HTM3_PSEAE | UPF0701 protein                                                                                       | yicC      | -1.3                  | 0.1438  |
| Q9HZH7_PSEAE | Molybdenum cofactor biosynthesis protein B                                                            | moaB_1    | -1.3                  | 0.1247  |
| HUTI_PSEAE   | Imidazolonepropionase                                                                                 | huti      | -1.3                  | 0.0789  |
| GCH1L_PSEAE  | GTP cyclohydrolase 1 type 2 homolog                                                                   | DR97_1622 | -1.3                  | 0.0277  |
| Q9HU31_PSEAE | Amino acid (Lysine/arginine/ornithine/histidine/octopine) ABC transporter periplasmic binding protein | artJ      | -1.3                  | 0.0281  |
| Q9HZI9_PSEAE | Universal stress protein                                                                              | DR97_4920 | -1.3                  | 0.0120  |
| THRC_PSEAE   | Threonine synthase                                                                                    | thrC      | -1.3                  | 0.1385  |
| Q9HWZ2_PSEAE | FecR protein                                                                                          | DR97_3832 | -1.3                  | 0.1296  |
| G3XD47_PSEAE | Arginine/ornithine binding protein AotJ                                                               | argT3     | -1.3                  | 0.0129  |
| Q9HY51_PSEAE | Antibiotic biosynthesis monooxygenase                                                                 | ycnE      | -1.3                  | 0.0285  |
| Q9I4S7_PSEAE | Probable esterase                                                                                     | DR97_897  | -1.3                  | 0.0876  |
| HISZ_PSEAE   | ATP phosphoribosyltransferase regulatory subunit                                                      | hisZ      | -1.4                  | 0.0950  |
| ILVD_PSEAE   | Dihydroxy-acid dehydratase (DAD)                                                                      | ilvD      | -1.4                  | 0.0302  |
| GATB_PSEAE   | Aspartyl/glutamyl-tRNA(Asn/Gln) amidotransferase subunit B                                            | gatB      | -1.4                  | 0.0991  |
| Q9HY22_PSEAE | Response regulator ErdR                                                                               | erdR      | -1.4                  | 0.1262  |
| Q9HTU9_PSEAE | Glyoxalase                                                                                            | elbB      | -1.4                  | 0.0958  |
| Q9I0R1_PSEAE | Nitroreductase                                                                                        | DR97_5594 | -1.4                  | 0.0323  |
| Q9I2A6_PSEAE | 3-hydroxybutyrate dehydrogenase                                                                       | bdhA      | -1.4                  | 0.1166  |
| CBPD_PSEAE   | Chitin-binding protein CbpD (Protease LasD)                                                           | cbpD      | -1.4                  | 0.1499  |
| GLMU_PSEAE   | Bifunctional protein GlmU                                                                             | glmU      | -1.4                  | 0.0295  |
| Q9I6K7_PSEAE | Sulfate-binding protein                                                                               | sbp1      | -1.4                  | 0.0675  |
| GATA_PSEAE   | Glutamyl-tRNA(Gln) amidotransferase subunit                                                           | gatA      | -1.4                  | 0.0708  |
| NADC_PSEAE   | Nicotinate-nucleotide pyrophosphorylase [carboxylating]                                               | nadC      | -1.4                  | 0.1439  |
| Q9HU22_PSEAE | Glucose-1-phosphate thymidyltransferase                                                               | rfbA      | -1.4                  | 0.0984  |
| NQOR_PSEAE   | NAD(P)H dehydrogenase (quinone) / Flavoprotein WrbA                                                   | wrbA      | -1.4                  | 0.0977  |
| HIS3_PSEAE   | Phosphoribosyl-AMP cyclohydrolase                                                                     | hisI      | -1.4                  | 0.1421  |
| CATA_PSEAE   | Catalase                                                                                              | katA      | -1.4                  | 0.0270  |
| PURA_PSEAE   | Adenylosuccinate synthetase                                                                           | purA      | -1.4                  | 0.0147  |
| RS18_PSEAE   | 30S ribosomal protein S18                                                                             | rpsR      | -1.5                  | 0.0407  |
| G3XD52_PSEAE | (R)-specific enoyl-CoA hydratase                                                                      | phaJ      | -1.5                  | 0.0274  |
| Q9HTR6_PSEAE | Nitrogen regulatory protein P-II 2                                                                    | glnK      | -1.5                  | 0.0481  |
| ACKA_PSEAE   | Acetate kinase                                                                                        | ackA1     | -1.5                  | 0.0980  |
| Q9HY11_PSEAE | Cytochrome D ubiquinol oxidase subunit II                                                             | DR97_4324 | -1.5                  | 0.1152  |
| Q9HW45_PSEAE | Xenobiotic reductase                                                                                  | nemA3     | -1.5                  | 0.0086  |
| TRPB_PSEAE   | Tryptophan synthase beta chain                                                                        | trpB      | -1.5                  | 0.0214  |
| G3XDA2_PSEAE | 3-oxoacyl-[acyl-carrier-protein] synthase 2                                                           | fabF1     | -1.5                  | 0.0274  |
| DEF_PSEAE    | Peptide deformylase                                                                                   | def_1     | -1.5                  | 0.0371  |
| Y3435_PSEAE  | Uncharacterized protein PA3435                                                                        | cinC      | -1.5                  | 0.0622  |
| Q9HXR0_PSEAE | Uncharacterized protein                                                                               | DR97_4146 | -1.5                  | 0.0362  |
| DAPA_PSEAE   | 4-hydroxy-tetrahydrodipicolinate synthase                                                             | dapA_1    | -1.5                  | 0.0366  |
| PYRE_PSEAE   | Orotate phosphoribosyltransferase                                                                     | pyrE      | -1.5                  | 0.0308  |
| CYSNC_PSEAE  | Bifunctional enzyme CysN/CysC                                                                         | cysN/C    | -1.5                  | 0.0445  |
| MTIP_PSEAE   | S-methyl-5-thioinosine phosphorylase                                                                  | mntP      | -1.5                  | 0.0300  |
| SPUE_PSEAE   | Spermidine-binding periplasmic protein SpuE                                                           | potF3     | -1.6                  | 0.0200  |
| Q9HVU7_PSEAE | Metalloprotease TldD                                                                                  | tldD      | -1.6                  | 0.0732  |
| LOLA_PSEAE   | Outer-membrane lipoprotein carrier protein                                                            | lolA      | -1.6                  | 0.1266  |
| CHMU_PSEAE   | Monofunctional chorismate mutase                                                                      | DR97_2554 | -1.6                  | 0.0283  |
| PROA_PSEAE   | Gamma-glutamyl phosphate reductase                                                                    | proA      | -1.6                  | 0.0611  |
| GCH12_PSEAE  | GTP cyclohydrolase 1 2                                                                                | folE3     | -1.6                  | 0.0994  |
| Q9I338_PSEAE | LTA synthase family protein                                                                           | DR97_198  | -1.6                  | 0.0436  |
| UBIC_PSEAE   | Probable chorismate pyruvate-lyase                                                                    | ubiC      | -1.6                  | 0.0949  |
| Q9I2D5_PSEAE | Lipoprotein                                                                                           | DR97_5879 | -1.6                  | 0.0293  |
| SAHH_PSEAE   | Adenosylhomocysteinase                                                                                | ahcY      | -1.6                  | 0.0098  |
| Q9I0Z1_PSEAE | Oxidoreductase MexS                                                                                   | DR97_5681 | -1.6                  | 0.0460  |
| Q9I296_PSEAE | Putative isovaleryl-CoA dehydrogenase                                                                 | IVD1      | -1.6                  | 0.0294  |
| Y4667_PSEAE  | TPR repeat-containing protein PA4667                                                                  | DR97_1976 | -1.6                  | 0.1251  |
| Q9HTN7_PSEAE | Probable binding protein component of ABC dipeptide transporter                                       | dppA1     | -1.6                  | 0.0337  |
| Q9I3D5_PSEAE | Succinate dehydrogenase flavoprotein subunit                                                          | sdhA      | -1.6                  | 0.0218  |
| Q9HX07_PSEAE | Murein peptide ligase                                                                                 | mpl       | -1.7                  | 0.0763  |
| Q9I610_PSEAE | Probable acyl-CoA dehydrogenase                                                                       | DR97_3476 | -1.7                  | 0.0321  |
| FUR_PSEAE    | Ferric uptake regulation protein                                                                      | fur       | -1.7                  | 0.0222  |
| Q9HXS8_PSEAE | Spermidine dehydrogenase, SpdH                                                                        | DR97_4164 | -1.7                  | 0.0289  |
| Q9I0D3_PSEAE | Cysteine synthase                                                                                     | cysK      | -1.7                  | 0.0355  |
| Q9HZ93_PSEAE | Probable aldolase                                                                                     | eda_1     | -1.7                  | 0.0299  |
| Y2980_PSEAE  | UPF0434 protein PA2980                                                                                | DR97_4959 | -1.7                  | 0.0665  |
| TOLB_PSEAE   | Tol-Pal system protein TolB                                                                           | tolB      | -1.7                  | 0.1398  |
| PDXJ_PSEAE   | Pyridoxine 5'-phosphate synthase                                                                      | pdxJ      | -1.7                  | 0.0276  |
| BIOB_PSEAE   | Biotin synthase                                                                                       | bioB      | -1.7                  | 0.0403  |
| METK_PSEAE   | S-adenosylmethionine synthase                                                                         | metK      | -1.7                  | 0.0327  |
| AK_PSEAE     | Aspartokinase                                                                                         | lysC      | -1.7                  | 0.0302  |
| Q9I2R2_PSEAE | Probable oxidoreductase                                                                               | yhfP      | -1.7                  | 0.0148  |
| Q9HWI2_PSEAE | Probable acyl-CoA dehydrogenase                                                                       | DR97_3476 | -1.7                  | 0.0415  |
| QOR_PSEAE    | Quinone oxidoreductase                                                                                | qor       | -1.8                  | 0.0667  |
| SUHB_PSEAE   | Inositol-1-monophosphatase                                                                            | suhB      | -1.8                  | 0.1402  |
| G3XCZ6_PSEAE | Malonyl CoA-acyl carrier protein transacylase                                                         | fabD      | -1.8                  | 0.0269  |
| Q9I2C4_PSEAE | NAD+ dependent aldehyde dehydrogenase ExaC                                                            | aldA3     | -1.8                  | 0.0304  |
| Q9HX05_PSEAE | Probable aldehyde dehydrogenase                                                                       | aldA1     | -1.8                  | 0.0306  |
| Q9HTF4_PSEAE | GbcA                                                                                                  | gbcA      | -1.8                  | 0.1320  |

## Supplementary Material

| Entry name   | Protein function                                                        | STRING ID | Log <sub>2</sub> ΔLFQ | q value |
|--------------|-------------------------------------------------------------------------|-----------|-----------------------|---------|
| ARCA_PSEAE   | Arginine deiminase                                                      | arcA      | -1.8                  | 0.0274  |
| Q91500_PSEAE | HIT domain-containing protein                                           | DR97_978  | -1.8                  | 0.1013  |
| CSRA_PSEAE   | Translational regulator CsrA                                            | DR97_1038 | -1.8                  | 0.0489  |
| PURE_PSEAE   | N5-carboxyaminoimidazole ribonucleotide mutase                          | purE      | -1.8                  | 0.0997  |
| Q9HUP7_PSEAE | Putative ADP-ribose pyrophosphatase                                     | DR97_2267 | -1.8                  | 0.0272  |
| Q916Q7_PSEAE | Beta-ketoadipate enol-lactone hydrolase                                 | catD      | -1.8                  | 0.0298  |
| FADB_PSEAE   | Fatty acid oxidation complex subunit alpha                              | fadB      | -1.8                  | 0.1171  |
| Q9HTL9_PSEAE | Enamine/Imine deaminase                                                 | yabJ_5    | -1.8                  | 0.0597  |
| Y3998_PSEAE  | UPF0250 protein PA3998                                                  | DR97_3869 | -1.8                  | 0.0272  |
| LDC_PSEAE    | Murein tetrapeptide carboxypeptidase                                    | DR97_2567 | -1.9                  | 0.0373  |
| Q910T0_PSEAE | Probable short-chain dehydrogenase                                      | linC_1    | -1.9                  | 0.0226  |
| Q916C3_PSEAE | Insulinase family protein                                               | DR97_3338 | -1.9                  | 0.1300  |
| NMO_PSEAE    | Nitronate monooxygenase                                                 | DR97_920  | -1.9                  | 0.0269  |
| 6PGL_PSEAE   | 6-phosphogluconolactonase (6PGL)                                        | pgl       | -1.9                  | 0.1264  |
| GLMS_PSEAE   | Glutamine--fructose-6-phosphate aminotransferase [isomerizing]          | glmS      | -1.9                  | 0.0458  |
| Q910V4_PSEAE | Metalloprotease TldD                                                    | DR97_5642 | -1.9                  | 0.0364  |
| Q91584_PSEAE | Morphogene protein BolA                                                 | bolA      | -1.9                  | 0.0290  |
| Q9HUQ0_PSEAE | Probable binding protein component of ABC transporter                   | livJ      | -1.9                  | 0.0335  |
| Q914W2_PSEAE | Lipoprotein                                                             | DR97_936  | -1.9                  | 0.0299  |
| Q913C4_PSEAE | Dienelactone hydrolase                                                  | DR97_292  | -1.9                  | 0.0562  |
| GATC_PSEAE   | Glutamyl-tRNA(Gln) amidotransferase subunit C                           | gatC      | -2.0                  | 0.1180  |
| Q9HTW6_PSEAE | Aminopeptidase P                                                        | pepP      | -2.0                  | 0.0778  |
| HGD_PSEAE    | Homogentisate 1,2-dioxygenase                                           | hmgA      | -2.0                  | 0.0291  |
| TAL_PSEAE    | Transaldolase                                                           | tal       | -2.0                  | 0.1212  |
| Q914D6_PSEAE | Probable hydrolase                                                      | ycaC      | -2.0                  | 0.0520  |
| Q913D4_PSEAE | Succinate dehydrogenase (B subunit)                                     | sdhB      | -2.0                  | 0.0323  |
| RL28_PSEAE   | 50S ribosomal protein L28                                               | rpmB      | -2.0                  | 0.0673  |
| PYRR_PSEAE   | Bifunctional protein PyrR                                               | pyrR      | -2.0                  | 0.0375  |
| MURD_PSEAE   | UDP-N-acetylmuramoylalanine--D-glutamate ligase                         | murD      | -2.0                  | 0.0669  |
| Q91766_PSEAE | Gamma carbonic anhydrase family protein                                 | yrdA      | -2.0                  | 0.0399  |
| GGT_PSEAE    | Glutathione hydrolase proenzyme                                         | DR97_456  | -2.0                  | 0.0151  |
| PHHC_PSEAE   | Aromatic-amino-acid aminotransferase                                    | phhC      | -2.0                  | 0.0140  |
| HISX_PSEAE   | Histidinol dehydrogenase                                                | hisD      | -2.0                  | 0.0407  |
| GMHA_PSEAE   | Phosphoheptose isomerase                                                | gmhA      | -2.0                  | 0.0432  |
| Q91015_PSEAE | Probable aminotransferase                                               | alaA      | -2.1                  | 0.1495  |
| Q9HVV1_PSEAE | Probable oxidoreductase                                                 | tas       | -2.1                  | 0.1268  |
| Q915T1_PSEAE | Ribulose-phosphate 3-epimerase                                          | rpe       | -2.1                  | 0.0672  |
| Q9HYP8_PSEAE | STAS-domain containing protein PA14_20770                               | DR97_4580 | -2.1                  | 0.0286  |
| Q9HXJ0_PSEAE | Iron-binding protein IscA                                               | iscA      | -2.1                  | 0.0274  |
| Q9HXK0_PSEAE | (R)-stereoselective amidase                                             | yafV      | -2.1                  | 0.0266  |
| Q911R3_PSEAE | Probable binding protein component of ABC transporter                   | DR97_6226 | -2.1                  | 0.0302  |
| Q9HYB3_PSEAE | Leucyl-tRNA synthetase                                                  | DR97_4428 | -2.1                  | 0.0452  |
| Q916W2_PSEAE | Uncharacterized protein PA14_02130                                      | DR97_3126 | -2.1                  | 0.0594  |
| Q912T8_PSEAE | Peptidylprolyl isomerase                                                | ppiD      | -2.1                  | 0.0483  |
| Q91514_PSEAE | Probable enoyl-CoA hydratase/isomerase                                  | DR97_1239 | -2.1                  | 0.0127  |
| BAUA_PSEAE   | Beta-alanine--pyruvate aminotransferase                                 | aptA      | -2.1                  | 0.0897  |
| Q91078_PSEAE | Putative peroxidase                                                     | DR97_5186 | -2.1                  | 0.0427  |
| METZ_PSEAE   | O-succinylhomoserine sulfhydrylase                                      | metZ      | -2.2                  | 0.0308  |
| Q911R8_PSEAE | Probable dehydrogenase                                                  | yfjR      | -2.2                  | 0.0077  |
| RNPH_PSEAE   | Ribonuclease PH                                                         | rph       | -2.2                  | 0.0298  |
| NUOG_PSEAE   | NADH-quinone oxidoreductase subunit G                                   | nuoG      | -2.2                  | 0.0875  |
| Q916Y9_PSEAE | Nonspecific ribonucleoside hydrolase                                    | nuh       | -2.2                  | 0.0295  |
| IMM2_PSEAE   | Pyocin-S2 immunity protein                                              | imm1      | -2.2                  | 0.0715  |
| GPML_PSEAE   | 2,3-bisphosphoglycerate-independent phosphoglycerate mutase             | gpml      | -2.2                  | 0.0357  |
| ISCS_PSEAE   | Cysteine desulfurase IscS                                               | iscS1     | -2.2                  | 0.1261  |
| HUTH_PSEAE   | Histidine ammonia-lyase                                                 | hutH      | -2.3                  | 0.0090  |
| ASTE_PSEAE   | Succinylglutamate desuccinylase                                         | astE      | -2.3                  | 0.0397  |
| G3XD40_PSEAE | Probable acyl-CoA thiolase                                              | thlA      | -2.3                  | 0.0370  |
| Q911E8_PSEAE | Acyl-CoA dehydrogenase                                                  | DR97_6102 | -2.3                  | 0.1242  |
| HEM3_PSEAE   | Porphobilinogen deaminase                                               | hemC      | -2.3                  | 0.0314  |
| ISPF_PSEAE   | 2-C-methyl-D-erythritol 2,4-cyclodiphosphate synthase                   | ispF      | -2.3                  | 0.0000  |
| HSLO_PSEAE   | 33 kDa chaperonin (Heat shock protein 33 homolog)                       | hslO      | -2.3                  | 0.0869  |
| Q91612_PSEAE | Probable acyl-CoA dehydrogenase                                         | DR97_3474 | -2.3                  | 0.1165  |
| HEM6_PSEAE   | Oxygen-dependent coproporphyrinogen-III oxidase                         | hemF      | -2.4                  | 0.0429  |
| Q9HYK7_PSEAE | Ferredoxin--NADP+ reductase                                             | fpr       | -2.4                  | 0.0160  |
| Q9HVS6_PSEAE | DUF541 domain-containing protein                                        | DR97_1674 | -2.4                  | 0.0590  |
| Q91513_PSEAE | Probable acyl-CoA dehydrogenase                                         | Acad8     | -2.4                  | 0.0522  |
| Q820A5_PSEAE | Probable pyridoxamine 5'-phosphate oxidase                              | phzD      | -2.4                  | 0.1208  |
| Q9HUA7_PSEAE | Probable binding protein component of ABC transporter                   | fliY_1    | -2.5                  | 0.0264  |
| G3XDB0_PSEAE | Catabolite repression control protein                                   | crc       | -2.5                  | 0.0998  |
| BRAC_PSEAE   | Leucine-, isoleucine-, valine-, threonine-, and alanine-binding protein | braC      | -2.5                  | 0.0367  |
| Y2116_PSEAE  | Putative hydro-lyase PA2116                                             | DR97_5736 | -2.5                  | 0.0298  |
| MTNA_PSEAE   | Methylthioribose-1-phosphate isomerase                                  | mtnA      | -2.5                  | 0.0604  |
| Q91298_PSEAE | Putative 3-methylglutaconyl-CoA hydratase                               | liuC      | -2.5                  | 0.0417  |
| FUMC1_PSEAE  | Fumarate hydratase class II 1                                           | fumC      | -2.5                  | 0.0494  |
| Q9HU92_PSEAE | N-formylglutamate amidohydrolase                                        | hutG3     | -2.5                  | 0.0285  |
| FABY_PSEAE   | Beta-ketoacyl-[acyl-carrier-protein] synthase FabY                      | DR97_2542 | -2.5                  | 0.0286  |
| Q9HZC5_PSEAE | Aminopeptidase N                                                        | pepN      | -2.5                  | 0.0369  |
| FABI_PSEAE   | Enoyl-[acyl-carrier-protein] reductase [NADH] FabI                      | fabI      | -2.5                  | 0.0169  |
| MTND_PSEAE   | Acireductone dioxygenase                                                | mtnD      | -2.6                  | 0.0277  |



| Entry name   | Protein function                                                    | STRING ID | Log <sub>2</sub> ΔLFQ | q value |
|--------------|---------------------------------------------------------------------|-----------|-----------------------|---------|
| ARUC_PSEAE   | Succinylornithine transaminase/acylornithine aminotransferase       | aruC      | -2.6                  | 0.0094  |
| Q9HW65_PSEAE | Protease                                                            | yfkM_1    | -2.6                  | 0.0998  |
| DNAJ_PSEAE   | Chaperone protein DnaJ                                              | dnaJ      | -2.6                  | 0.0454  |
| TGT_PSEAE    | Queuine tRNA-ribosyltransferase                                     | tgt       | -2.7                  | 0.0487  |
| Q9HVZ7_PSEAE | UDP-N-acetylmuramoyl-tripeptide--D-alanyl-D-alanine ligase          | murF      | -2.7                  | 0.0135  |
| PYRC_PSEAE   | Dihydroorotase                                                      | DR97_4415 | -2.7                  | 0.0280  |
| ASTB_PSEAE   | N-succinylarginine dihydrolase                                      | astB      | -2.7                  | 0.0377  |
| PUR2_PSEAE   | Phosphoribosylamine--glycine ligase                                 | purD      | -2.7                  | 0.0409  |
| PORD_PSEAE   | Porin D                                                             | oprD5     | -2.7                  | 0.0301  |
| Q9HUE4_PSEAE | Homocysteine synthase                                               | cysD1     | -2.7                  | 0.0143  |
| CYSM_PSEAE   | Cysteine synthase B                                                 | cysM      | -2.7                  | 0.0305  |
| Q9I5I5_PSEAE | Probable enoyl-CoA hydratase/isomerase                              | DR97_1240 | -2.7                  | 0.0302  |
| ALKD_PSEAE   | 2-dehydro-3-deoxy-phosphogluconate aldolase                         | eda_4     | -2.7                  | 0.0083  |
| SKPL_PSEAE   | Skp-like protein                                                    | skp       | -2.8                  | 0.0666  |
| Q9HX85_PSEAE | ABC transporter substrate-binding protein                           | metQ1     | -2.8                  | 0.0307  |
| G3XCV4_PSEAE | Probable pyridoxamine 5'-phosphate oxidase                          | phzD      | -2.8                  | 0.0874  |
| AROC_PSEAE   | Chorismate synthase                                                 | aroC      | -2.8                  | 0.0305  |
| PQSD_PSEAE   | Anthraniloyl-CoA anthraniloyltransferase                            | pqsD      | -2.8                  | 0.0298  |
| KYNB_PSEAE   | Kynurenine formamidase                                              | kynB      | -2.9                  | 0.1429  |
| Q9HVX5_PSEAE | Alpha/beta hydrolase                                                | DR97_1618 | -2.9                  | 0.0365  |
| RS19_PSEAE   | 30S ribosomal protein S19                                           | rpsS      | -2.9                  | 0.0303  |
| Q9HTI6_PSEAE | Choline ABC transporter substrate-binding protein                   | gbuC_2    | -2.9                  | 0.0405  |
| EFG2_PSEAE   | Elongation factor G 2                                               | fusB      | -3.0                  | 0.0292  |
| SECB_PSEAE   | Protein-export protein SecB                                         | secB      | -3.0                  | 0.0761  |
| PHZB2_PSEAE  | Phenazine biosynthesis protein PhzB2                                | phzB2_2   | -3.0                  | 0.0271  |
| LIUE_PSEAE   | 3-hydroxy-3-isohexenylglutaryl-CoA/hydroxy-methylglutaryl-CoA lyase | HMGCL     | -3.0                  | 0.0072  |
| Q9I6G0_PSEAE | L-threonine dehydratase                                             | ilvA1     | -3.1                  | 0.0297  |
| CLPP2_PSEAE  | ATP-dependent Clp protease proteolytic subunit 2                    | clpP2     | -3.1                  | 0.0663  |
| Q9I659_PSEAE | Probable ClpA/B protease ATP binding subunit                        | clpB1     | -3.1                  | 0.0413  |
| CATB_PSEAE   | Catalase (Paraquat-inducible catalase isozyme B)                    | katB      | -3.1                  | 0.0274  |
| Q9HT28_PSEAE | Class I SAM-dependent methyltransferase                             | DR97_2925 | -3.2                  | 0.0319  |
| Q9HX12_PSEAE | Aldehyde dehydrogenase, PaaZ                                        | phaJ4     | -3.2                  | 0.0277  |
| RMLC_PSEAE   | dTDP-4-dehydrothamnose 3,5-epimerase                                | rfbC      | -3.3                  | 0.0302  |
| PUR8_PSEAE   | Adenylosuccinate lyase                                              | DR97_5333 | -3.3                  | 0.0139  |
| Q9HY02_PSEAE | S-formylglutathione hydrolase                                       | fghA      | -3.3                  | 0.0108  |
| Q9HZ04_PSEAE | Probable glycine betaine-binding protein                            | gbuC_3    | -3.4                  | 0.0158  |
| NUOF_PSEAE   | NADH-quinone oxidoreductase subunit F                               | nuoF      | -3.4                  | 0.0368  |
| PHZD1_PSEAE  | Phenazine biosynthesis protein PhzD1                                | DR97_3698 | -3.4                  | 0.0135  |
| Q9HZA1_PSEAE | Enamine deaminase RidA                                              | DR97_4810 | -3.4                  | 0.0271  |
| EDD_PSEAE    | Phosphogluconate dehydratase                                        | edd       | -3.5                  | 0.0098  |
| PQSB_PSEAE   | 2-heptyl-4(1H)-quinolone synthase subunit PqsB                      | pqsB      | -3.6                  | 0.0353  |
| AHPF_PSEAE   | Alkyl hydroperoxide reductase subunit F                             | ahpF      | -3.6                  | 0.0090  |
| Q9HTG8_PSEAE | Peptidase M19                                                       | DR97_2772 | -3.6                  | 0.0275  |
| FADH_PSEAE   | Glutathione-independent formaldehyde dehydrogenase                  | fdhA      | -3.7                  | 0.0536  |
| GSHR_PSEAE   | Glutathione reductase                                               | gor       | -3.7                  | 0.0661  |
| G3P_PSEAE    | Glyceraldehyde-3-phosphate dehydrogenase                            | gap1      | -3.8                  | 0.0000  |
| Q9I2F8_PSEAE | Binding protein component of ABC ribose transporter                 | rbsB      | -3.8                  | 0.0000  |
| Q9I6H4_PSEAE | FAD-binding oxidoreductase                                          | DR97_3281 | -3.8                  | 0.0132  |
| Q9HZI4_PSEAE | MOSC domain-containing protein                                      | DR97_4915 | -3.9                  | 0.0135  |
| Q9I081_PSEAE | Cupin                                                               | DR97_5191 | -3.9                  | 0.0272  |
| Q9HVR9_PSEAE | Probable binding protein component of ABC transporter               | dppA3     | -3.9                  | 0.0000  |
| PHZD2_PSEAE  | Phenazine biosynthesis protein PhzD2                                | DR97_3698 | -4.0                  | 0.0000  |
| Y3922_PSEAE  | Uncharacterized protein PA3922                                      | DR97_3944 | -4.1                  | 0.0280  |
| Q9I593_PSEAE | Probable alkyl hydroperoxide reductase                              | DR97_1096 | -4.1                  | 0.0108  |
| Q9HVS5_PSEAE | Probable binding protein component of ABC transporter               | dppA9     | -4.3                  | 0.0120  |
| Q9I1E7_PSEAE | Alkyl hydroperoxide reductase AhpD                                  | DR97_6101 | -4.5                  | 0.0310  |
| Q9HVS1_PSEAE | Probable binding protein component of ABC transporter               | dppA5     | -4.5                  | 0.0278  |
| Y3332_PSEAE  | Uncharacterized PhzA/B-like protein PA3332                          | DR97_4595 | -4.6                  | 0.0294  |
| MMSA_PSEAE   | Methylmalonate-semialdehyde dehydrogenase [acylating]               | mmsA1     | -4.7                  | 0.0103  |
| HUTU_PSEAE   | Urocanate hydratase                                                 | hutU      | -4.8                  | 0.0080  |
| Q9HZ48_PSEAE | Probable binding protein component of ABC sugar transporter         | DR97_4746 | -5.4                  | 0.0083  |
| PHZB1_PSEAE  | Phenazine biosynthesis protein PhzB1                                | phzB1     | -5.7                  | 0.0289  |
| PHZM_PSEAE   | Phenazine-1-carboxylate N-methyltransferase                         | phzM      | -5.8                  | 0.0000  |

**Table S7:** Differences in *S. aureus* protein abundance (Student's *t*-test, FDR 0.15) in co-culture vs. monoculture exoproteome.

| Entry name     | Protein function                             | STRING ID  | Log <sub>2</sub> ΔLFQ | q value |
|----------------|----------------------------------------------|------------|-----------------------|---------|
| WP_000752917.1 | CsbD family protein                          | AID39348.1 | 3.7                   | 0.0634  |
| WP_000401377.1 | phosphopantetheine adenylyltransferase       | coaD       | 2.0                   | 0.0480  |
| WP_000447678.1 | beta-hydroxyacyl-ACP dehydratase             | fabZ       | 2.0                   | 0.0873  |
| WP_000228670.1 | protein-tyrosine-phosphatase                 | ptpA       | 1.9                   | 0.0000  |
| WP_000180460.1 | DUF1128 domain-containing protein            | AID40418.1 | 1.8                   | 0.0489  |
| WP_000818278.1 | succinate dehydrogenase flavoprotein subunit | sdhA       | 1.5                   | 0.0704  |
| WP_000181127.1 | polyisoprenoid-binding protein               | AID41402.1 | 1.4                   | 0.0733  |

| Entry name     | Protein function                                                                          | STRING ID  | Log <sub>2</sub> ΔLF Q | q value |
|----------------|-------------------------------------------------------------------------------------------|------------|------------------------|---------|
| WP_000018608.1 | cell division protein SepF                                                                | sepF       | 1.4                    | 0.1032  |
| WP_000848351.1 | phosphoribosylformylglycinamide synthase subunit PurS                                     | purS       | 1.2                    | 0.0680  |
| WP_001231458.1 | diacylglycerol kinase                                                                     | dagK       | 1.2                    | 0.0886  |
| WP_001123276.1 | tautomerase                                                                               | AID39820.1 | 1.1                    | 0.0853  |
| WP_000214898.1 | DUF2187 domain-containing protein                                                         | AID39466.1 | 1.0                    | 0.1477  |
| WP_000277983.1 | formimidoylglutamase                                                                      | hutG       | 1.0                    | 0.1327  |
| WP_000457386.1 | 50S ribosomal protein L21                                                                 | rplU       | 1.0                    | 0.0484  |
| WP_000075713.1 | heme-dependent peroxidase                                                                 | AID39084.1 | 0.9                    | 0.0000  |
| WP_000781946.1 | zinc-binding alcohol dehydrogenase                                                        | AID40879.1 | 0.9                    | 0.0843  |
| WP_000811163.1 | thioredoxin                                                                               | AID40215.1 | 0.8                    | 0.0535  |
| WP_000446724.1 | 7-cyano-7-deazaguanine synthase QueC                                                      | queC       | 0.8                    | 0.0725  |
| WP_000934799.1 | single-stranded DNA-binding protein                                                       | ssb        | 0.8                    | 0.1487  |
| WP_000249652.1 | tRNA uridine-5-carboxymethylaminomethyl(34) synthesis enzyme MnmG                         | gidA       | 0.8                    | 0.0476  |
| WP_000668339.1 | cell-wall-binding lipoprotein                                                             | AID39529.1 | 0.8                    | 0.0367  |
| WP_000640738.1 | 1-phosphofructokinase                                                                     | fruB       | 0.8                    | 0.0511  |
| WP_000148605.1 | redox-regulated molecular chaperone Hsp33                                                 | hslO       | 0.7                    | 0.0966  |
| WP_000032653.1 | NUDIX domain-containing protein                                                           | AID40145.1 | 0.7                    | 0.0904  |
| WP_001793983.1 | aminopeptidase PepS                                                                       | AID40417.1 | 0.6                    | 0.0681  |
| WP_000197806.1 | phosphopentomutase                                                                        | deoB       | 0.6                    | 0.0564  |
| WP_001261460.1 | 30S ribosomal protein S6                                                                  | rpsF       | 0.6                    | 0.1468  |
| WP_001096577.1 | 50S ribosomal protein L30                                                                 | rpmD       | 0.6                    | 0.1022  |
| WP_000985618.1 | bacillithiol system redox-active protein YtxJ                                             | AID39249.1 | 0.5                    | 0.1490  |
| WP_000193707.1 | phosphogluconate dehydrogenase (NADP(+)-dependent, decarboxylating)                       | gnd        | 0.5                    | 0.0564  |
| WP_000631982.1 | cysteine--tRNA ligase                                                                     | cysS       | 0.5                    | 0.1474  |
| WP_000160304.1 | purine-nucleoside phosphorylase                                                           | AID40824.1 | 0.5                    | 0.0881  |
| WP_000514375.1 | nitrate reductase subunit alpha                                                           | narG       | 0.4                    | 0.0532  |
| WP_000863437.1 | dihydrolypoyllysine-residue acetyltransferase component of pyruvate dehydrogenase complex | pdhC       | 0.4                    | 0.0569  |
| WP_000918664.1 | DNA-directed RNA polymerase subunit beta                                                  | rpoB       | 0.4                    | 0.0871  |
| WP_000734077.1 | alanine--tRNA ligase                                                                      | alaS       | 0.4                    | 0.0708  |
| WP_001260089.1 | triose-phosphate isomerase                                                                | tpiA       | 0.4                    | 0.1029  |
| WP_000626504.1 | elongation factor P                                                                       | efp        | 0.3                    | 0.1456  |
| WP_000035325.1 | pyruvate dehydrogenase E1 component subunit alpha                                         | pdhA       | 0.3                    | 0.1208  |
| WP_000081181.1 | beta-ketoacyl-[acyl-carrier-protein] synthase II                                          | fabF       | -0.2                   | 0.1218  |
| WP_000424963.1 | GMP synthase (glutamine-hydrolyzing)                                                      | guaA       | -0.3                   | 0.0931  |
| WP_000842032.1 | lipase                                                                                    | AID41384.1 | -0.3                   | 0.0966  |
| WP_000933774.1 | ribose-phosphate pyrophosphokinase                                                        | prs        | -0.3                   | 0.1130  |
| WP_000057594.1 | cysteine synthase                                                                         | cysK       | -0.3                   | 0.0700  |
| WP_000068176.1 | pyruvate dehydrogenase E1 component subunit beta                                          | pdhB       | -0.3                   | 0.0863  |
| WP_000186043.1 | tyrosine--tRNA ligase                                                                     | tyrS       | -0.4                   | 0.0715  |
| WP_000473654.1 | glucose-specific phosphotransferase enzyme IIA component                                  | crr        | -0.4                   | 0.1110  |
| WP_000277602.1 | universal stress protein                                                                  | AID40175.1 | -0.4                   | 0.0843  |
| WP_000082722.1 | oligoendopeptidase F                                                                      | AID39438.1 | -0.4                   | 0.0603  |
| WP_000048712.1 | uracil phosphoribosyltransferase                                                          | upp        | -0.5                   | 0.0704  |
| WP_001251219.1 | glucosamine-6-phosphate isomerase                                                         | AID40324.1 | -0.5                   | 0.0892  |
| WP_000098285.1 | lipoteichoic acid synthase                                                                | ltaS       | -0.5                   | 0.1277  |
| WP_001185462.1 | hydroxymethylpyrimidine/phosphomethylpyrimidine kinase                                    | AID39077.1 | -0.5                   | 0.0691  |
| WP_000863474.1 | signal recognition particle protein                                                       | ffh        | -0.5                   | 0.1045  |
| WP_000157650.1 | 50S ribosomal protein L25                                                                 | ctc        | -0.5                   | 0.0873  |
| WP_000959426.1 | alanine dehydrogenase                                                                     | ald1       | -0.5                   | 0.0668  |
| WP_001130051.1 | malate:quinone oxidoreductase                                                             | AID41318.1 | -0.5                   | 0.0541  |
| WP_001074749.1 | phosphoglycerate kinase                                                                   | pgk        | -0.5                   | 0.0693  |
| WP_000034728.1 | pyridoxal 5'-phosphate synthase lyase subunit PdxS                                        | pdxS       | -0.5                   | 0.0714  |
| WP_000358009.1 | UDP-N-acetylglucosamine 1-carboxyvinyltransferase                                         | murA1      | -0.5                   | 0.1316  |
| WP_000532966.1 | YebC/PmpR family DNA-binding transcriptional regulator                                    | AID39177.1 | -0.5                   | 0.1221  |
| WP_000908974.1 | phenylalanine--tRNA ligase subunit beta                                                   | pheT       | -0.6                   | 0.0440  |
| WP_000169223.1 | 6-phospho-beta-galactosidase                                                              | lacG       | -0.6                   | 0.1409  |
| WP_000185311.1 | glycerophosphodiester phosphodiesterase                                                   | glpQ       | -0.6                   | 0.0613  |
| WP_000955797.1 | bifunctional acetaldehyde-CoA/alcohol dehydrogenase                                       | adhE       | -0.6                   | 0.0499  |
| WP_000210828.1 | serine/threonine dehydratase                                                              | tdcB       | -0.7                   | 0.0523  |
| WP_000116227.1 | class II fumarate hydratase                                                               | fumC       | -0.7                   | 0.0644  |
| WP_000279414.1 | Glyceraldehyde-3-phosphate dehydrogenase 1                                                | gapA1      | -0.7                   | 0.0501  |
| WP_000858795.1 | asparagine--tRNA ligase                                                                   | asnS       | -0.7                   | 0.0706  |
| WP_000670755.1 | FAA hydrolase family protein                                                              | AID39404.1 | -0.7                   | 0.0469  |
| WP_001230225.1 | hydroxymethylbilane synthase                                                              | hemC       | -0.7                   | 0.1326  |
| WP_000257888.1 | DUF1447 family protein                                                                    | AID39527.1 | -0.7                   | 0.0885  |
| WP_001218603.1 | aerobic glycerol-3-phosphate dehydrogenase                                                | glpD       | -0.7                   | 0.1176  |
| WP_000958522.1 | chromosome partitioning protein ParA                                                      | AID40854.1 | -0.7                   | 0.0703  |
| WP_000813536.1 | pyruvate decarboxylase                                                                    | AID38614.1 | -0.7                   | 0.0518  |
| WP_000290401.1 | aldehyde dehydrogenase                                                                    | aldA       | -0.8                   | 0.1416  |
| WP_000166055.1 | fatty acid-binding protein DegV                                                           | AID39887.1 | -0.8                   | 0.0694  |
| WP_000138487.1 | NAD-specific glutamate dehydrogenase                                                      | gluD       | -0.8                   | 0.0720  |
| WP_001043863.1 | DNA-binding protein HU                                                                    | AID39935.1 | -0.8                   | 0.0752  |
| WP_000202178.1 | glycine dehydrogenase                                                                     | gcvPB      | -0.8                   | 0.0884  |
| WP_000219068.1 | catabolite control protein A                                                              | ccpA       | -0.8                   | 0.0852  |
| WP_001118708.1 | nitrite reductase large subunit                                                           | nasD       | -0.8                   | 0.1120  |
| WP_000872486.1 | 2-C-methyl-D-erythritol 4-phosphate cytidyltransferase                                    | tarI       | -0.8                   | 0.0656  |
| WP_000136257.1 | thiol peroxidase Tpx                                                                      | tpx        | -0.9                   | 0.0498  |

| Entry name     | Protein function                                              | STRING ID  | Log <sub>2</sub> ΔLFQ | q value |
|----------------|---------------------------------------------------------------|------------|-----------------------|---------|
| WP_000860045.1 | 3-methyl-2-oxobutanoate hydroxymethyltransferase              | panB       | -0.9                  | 0.0575  |
| WP_000178881.1 | 30S ribosomal protein S8                                      | rpsH       | -0.9                  | 0.0524  |
| WP_001274017.1 | 30S ribosomal protein S20                                     | rpsT       | -0.9                  | 0.0711  |
| WP_001074353.1 | carbamate kinase 1                                            | arcC1      | -0.9                  | 0.0684  |
| WP_000503824.1 | molybdenum cofactor biosynthesis protein                      | moaB       | -1.0                  | 0.0547  |
| WP_001279341.1 | PDZ domain-containing protein                                 | AID40197.1 | -1.0                  | 0.0931  |
| WP_000867193.1 | dihydroxyacetone kinase subunit L                             | AID39159.1 | -1.1                  | 0.0833  |
| WP_000902175.1 | hypothetical protein                                          | AID39870.1 | -1.1                  | 0.0547  |
| WP_000163281.1 | type 1 glutamine amidotransferase                             | AID40346.1 | -1.1                  | 0.1177  |
| WP_001172340.1 | acetyl-CoA synthetase                                         | AID41319.1 | -1.1                  | 0.0505  |
| WP_000737654.1 | manganese transport protein C (MntC)                          | AID39138.1 | -1.2                  | 0.1210  |
| WP_000660054.1 | argininosuccinate synthase                                    | argG       | -1.2                  | 0.0588  |
| WP_000167269.1 | 3-oxoacyl-[acyl-carrier-protein] reductase                    | fabG       | -1.2                  | 0.0603  |
| WP_000437472.1 | phosphocarrier protein HPr                                    | AID39520.1 | -1.2                  | 0.0484  |
| WP_001124985.1 | arginine repressor                                            | AID39985.1 | -1.2                  | 0.0590  |
| WP_000792567.1 | immunoglobulin-binding protein sbi                            | sbi        | -1.2                  | 0.1414  |
| WP_001283444.1 | MarR family transcriptional regulator                         | rat        | -1.3                  | 0.1475  |
| WP_000163995.1 | 6-phospho-beta-glucosidase                                    | bglA       | -1.3                  | 0.0491  |
| WP_000036076.1 | HTH-type transcriptional regulator SarR                       | sarR       | -1.3                  | 0.0657  |
| WP_000186306.1 | Cof-type HAD-IIB family hydrolase                             | AID39789.1 | -1.3                  | 0.0562  |
| WP_001051856.1 | YtxH domain-containing protein                                | AID40224.1 | -1.3                  | 0.0714  |
| WP_000649898.1 | glutamate ABC transporter permease                            | AID40328.1 | -1.3                  | 0.0692  |
| WP_001270861.1 | glutamate-1-semialdehyde 2,1-aminomutase                      | hemL1      | -1.3                  | 0.0551  |
| WP_001018677.1 | transcriptional regulator SarA                                | sarA       | -1.3                  | 0.1165  |
| WP_001030080.1 | glycine--tRNA ligase                                          | glyQS      | -1.5                  | 0.0693  |
| WP_000690439.1 | pyridoxal 5'-phosphate synthase glutaminase subunit PdxT      | pdxT       | -1.5                  | 0.0573  |
| WP_000942303.1 | ABC transporter ATP-binding protein                           | AID39848.1 | -1.5                  | 0.1493  |
| WP_000717560.1 | ATP-dependent 6-phosphofruktokinase                           | pfkA       | -1.5                  | 0.1047  |
| AIO22395.1     | p_multicopper oxidase                                         | #N/A       | -1.5                  | 0.0981  |
| WP_000277155.1 | hypothetical multicopper oxidase protein                      | #N/A       | -1.5                  | 0.0991  |
| WP_000545373.1 | Asp-tRNA(Asn)/Glu-tRNA(Gln) amidotransferase GatCAB subunit B | gatB       | -1.5                  | 0.0510  |
| WP_000751265.1 | transglycosylase IsaA                                         | isaA       | -1.6                  | 0.1188  |
| WP_000019697.1 | aminomethyl-transferring glycine dehydrogenase                | gcvPA      | -1.6                  | 0.0718  |
| WP_000745926.1 | clumping factor B (ClfB)                                      | clfB       | -1.6                  | 0.0881  |
| WP_001283612.1 | redox-sensing transcriptional repressor Rex                   | rex        | -1.7                  | 0.0488  |
| WP_000735554.1 | putative exported protein                                     | AID39120.1 | -1.7                  | 0.0360  |
| WP_000876758.1 | HTH-type transcriptional regulator SarS                       | sarS       | -1.7                  | 0.0524  |
| WP_000057330.1 | UMP kinase                                                    | pyrH       | -1.7                  | 0.0862  |
| WP_000134231.1 | GTP cyclohydrolase I FolE2                                    | folE2      | -1.8                  | 0.0400  |
| WP_000088195.1 | cysteine hydrolase                                            | entB2      | -1.9                  | 0.0430  |
| WP_000097322.1 | ribosome-binding factor A                                     | rbfA       | -2.0                  | 0.0892  |
| WP_001174260.1 | YpdA family putative bacillithiol disulfide reductase         | AID39942.1 | -2.2                  | 0.0270  |
| WP_000027924.1 | Asp-tRNA(Asn)/Glu-tRNA(Gln) amidotransferase GatCAB subunit A | gatA       | -2.4                  | 0.0522  |
| WP_000617735.1 | ribosomal subunit interface protein                           | hpf        | -3.4                  | 0.0510  |
| WP_000976253.1 | dihydroxyacetone kinase subunit DhaK                          | AID39158.1 | -3.5                  | 0.0432  |

**Table S8:** Differentially expressed *P. aeruginosa* proteins (Student's *t*-test, FDR 0.15) in co-culture vs. monoculture surfaceome.

| Entry name   | Protein function                                                                                 | STRING ID | Log <sub>2</sub> ΔLFQ | q value |
|--------------|--------------------------------------------------------------------------------------------------|-----------|-----------------------|---------|
| ODO2_PSEAE   | Dihydropolyllysine-residue succinyltransferase component of 2-oxoglutarate dehydrogenase complex | sucB      | 6.7                   | 0.0000  |
| ETFB_PSEAE   | Electron transfer flavoprotein subunit beta                                                      | etfB      | 5.5                   | 0.0048  |
| RL2_PSEAE    | 50S ribosomal protein L2                                                                         | rplB      | 5.4                   | 0.0057  |
| Q9HTQ4_PSEAE | Cytochrome c5                                                                                    | cycB      | 5.3                   | 0.0000  |
| Q9HX76_PSEAE | Probable DNA binding protein                                                                     | hupA      | 5.2                   | 0.0045  |
| EFP_PSEAE    | Elongation factor P                                                                              | efp       | 5.0                   | 0.0037  |
| RL9_PSEAE    | 50S ribosomal protein L9                                                                         | rplI      | 4.9                   | 0.0000  |
| AZUR_PSEAE   | Azurin                                                                                           | azu       | 4.9                   | 0.0049  |
| METK_PSEAE   | S-adenosylmethionine synthase                                                                    | metK      | 4.7                   | 0.0040  |
| ILVC_PSEAE   | Ketol-acid reductoisomerase (NADP(+))                                                            | ilvC      | 4.5                   | 0.0059  |
| Q9HTD1_PSEAE | Probable transcarboxylase subunit                                                                | oadA      | 4.4                   | 0.0036  |
| Q9HW68_PSEAE | Fumarate hydratase class I                                                                       | fumA      | 4.3                   | 0.0000  |
| Q9HV96_PSEAE | Polynucleotide kinase                                                                            | DR97_2043 | 4.3                   | 0.0000  |
| Q9HVU0_PSEAE | Rod shape-determining protein MreB                                                               | mreB      | 4.3                   | 0.0000  |
| Q9HVA3_PSEAE | Phosphatidylserine synthase                                                                      | psaA      | 4.2                   | 0.0000  |
| CATA_PSEAE   | Catalase                                                                                         | katA      | 4.2                   | 0.0150  |
| P5217_PSEAE  | Probable binding protein component of ABC iron transporter PA5217                                | DR97_2586 | 4.1                   | 0.0052  |
| Q9I5I4_PSEAE | Probable enoyl-CoA hydratase/isomerase                                                           | DR97_1239 | 4.0                   | 0.0136  |
| ALGP_PSEAE   | Transcriptional regulatory protein AlgP                                                          | algP      | 4.0                   | 0.0055  |
| GLN1B_PSEAE  | Glutamine synthetase                                                                             | glnA      | 4.0                   | 0.0164  |
| RL16_PSEAE   | 50S ribosomal protein L16                                                                        | rplP      | 3.9                   | 0.0000  |
| NUSG_PSEAE   | Transcription termination/antitermination protein NusG                                           | nusG      | 3.9                   | 0.0039  |

| Entry name   | Protein function                                          | STRING ID | Log <sub>2</sub> ΔLFQ | q value |
|--------------|-----------------------------------------------------------|-----------|-----------------------|---------|
| RF3_PSEAE    | Peptide chain release factor 3                            | prfC      | 3.8                   | 0.0073  |
| Q913D3_PSEAE | 2-oxoglutarate dehydrogenase (E1 subunit)                 | sucA      | 3.8                   | 0.0000  |
| SPUE_PSEAE   | Spermidine-binding periplasmic protein SpuE               | potF3     | 3.8                   | 0.0050  |
| PQSD_PSEAE   | Anthranyl-CoA anthraniloyltransferase                     | pqsD      | 3.8                   | 0.0133  |
| SYC_PSEAE    | Cysteine-tRNA ligase                                      | cysS      | 3.8                   | 0.0000  |
| IPYR_PSEAE   | Inorganic pyrophosphatase                                 | ppa       | 3.8                   | 0.0000  |
| RL11_PSEAE   | 50S ribosomal protein L11                                 | rplK      | 3.7                   | 0.0042  |
| ENO_PSEAE    | Enolase                                                   | eno       | 3.7                   | 0.0162  |
| Q9HUT3_PSEAE | Probable bacterioferritin                                 | DR97_2231 | 3.6                   | 0.0057  |
| Q9HVF9_PSEAE | M48 family peptidase                                      | DR97_1939 | 3.6                   | 0.0045  |
| Q91411_PSEAE | Ribonucleoside-diphosphate reductase                      | nrdA      | 3.5                   | 0.0041  |
| NUOB_PSEAE   | NADH-quinone oxidoreductase subunit B                     | nuoB      | 3.4                   | 0.0000  |
| Q915E5_PSEAE | 2-methylaconitate cis-trans isomerase PrpF                | prpF      | 3.4                   | 0.0281  |
| Q9HWV4_PSEAE | ABC transporter periplasmic binding protein MlaC          | ttq2D     | 3.4                   | 0.0000  |
| Q9HW72_PSEAE | Pyruvate kinase                                           | pykA      | 3.4                   | 0.0728  |
| PYRX_PSEAE   | Dihydroorotase-like protein                               | pyrC      | 3.4                   | 0.0000  |
| Q9HW45_PSEAE | Xenobiotic reductase                                      | nemA3     | 3.3                   | 0.0077  |
| SY1_PSEAE    | Isoleucine-tRNA ligase                                    | ileS      | 3.3                   | 0.0163  |
| FABY_PSEAE   | Beta-ketoacyl-[acyl-carrier-protein] synthase FabY        | DR97_2542 | 3.3                   | 0.0163  |
| CBPD_PSEAE   | Chitin-binding protein CbpD (Protease LasD)               | cbpD      | 3.3                   | 0.0193  |
| GLMU_PSEAE   | Bifunctional protein GlmU                                 | glmU      | 3.3                   | 0.0165  |
| Q915F6_PSEAE | Bifunctional protein PutA                                 | putA      | 3.3                   | 0.0073  |
| PYRB_PSEAE   | Aspartate carbamoyltransferase                            | pyrB      | 3.2                   | 0.0043  |
| CLPV1_PSEAE  | Protein ClpV1                                             | clpV1-1   | 3.2                   | 0.0137  |
| MQO2_PSEAE   | Probable malate:quinone oxidoreductase 2                  | mgo2      | 3.2                   | 0.0056  |
| GATB_PSEAE   | Aspartyl/glutamyl-tRNA                                    | gatB      | 3.1                   | 0.0075  |
| PILH_PSEAE   | Protein PilH                                              | pilH      | 3.1                   | 0.0109  |
| GALU_PSEAE   | UTP--glucose-1-phosphate uridylyltransferase              | galU      | 3.1                   | 0.0055  |
| PPK1_PSEAE   | Polyphosphate kinase                                      | ppk1      | 3.1                   | 0.0135  |
| Q9HV83_PSEAE | Probable aminotransferase                                 | alaC      | 3.0                   | 0.0115  |
| Q9HVJ1_PSEAE | Probable ATP-binding component of ABC transporter         | DR97_1900 | 3.0                   | 0.0053  |
| IF3_PSEAE    | Translation initiation factor IF-3                        | infC      | 3.0                   | 0.1142  |
| BAMD_PSEAE   | Outer membrane protein assembly factor BamD               | yfiO      | 3.0                   | 0.0061  |
| PHZM_PSEAE   | Phenazine-1-carboxylate N-methyltransferase               | phzM      | 3.0                   | 0.0161  |
| ISPG_PSEAE   | 4-hydroxy-3-methylbut-2-en-1-yl diphosphate synthase      | ispG      | 3.0                   | 0.0158  |
| Q915A3_PSEAE | Peptidyl-prolyl cis-trans isomerase                       | slyD      | 3.0                   | 0.0033  |
| Q9HTP2_PSEAE | Probable aldehyde dehydrogenase                           | puuC5     | 2.9                   | 0.0045  |
| ATPB_PSEAE   | ATP synthase subunit beta                                 | atpD      | 2.9                   | 0.0000  |
| SECA_PSEAE   | Protein translocase subunit SecA                          | secA      | 2.9                   | 0.0048  |
| Q9HW32_PSEAE | Insulin-cleaving metalloproteinase outer membrane protein | icmP      | 2.9                   | 0.0113  |
| Q912W9_PSEAE | Phosphoenolpyruvate synthase                              | ppsA      | 2.9                   | 0.0032  |
| Q9HXP8_PSEAE | Signal recognition particle protein                       | ffh       | 2.9                   | 0.0000  |
| Q9HVA8_PSEAE | Ferric iron-binding periplasmic protein HitA              | fbpA      | 2.9                   | 0.0047  |
| PHZD1_PSEAE  | Phenazine biosynthesis protein PhzD1                      | DR97_3698 | 2.9                   | 0.0131  |
| RS19_PSEAE   | 30S ribosomal protein S19                                 | rpsS      | 2.9                   | 0.0035  |
| G6PI_PSEAE   | Glucose-6-phosphate isomerase                             | pgi       | 2.9                   | 0.0041  |
| Q91765_PSEAE | Oligopeptidase A                                          | prlC      | 2.8                   | 0.0046  |
| SYK_PSEAE    | Lysine-tRNA ligase                                        | lysS      | 2.8                   | 0.0283  |
| Q91412_PSEAE | Ribonucleoside-diphosphate reductase subunit beta         | nrdB      | 2.8                   | 0.0708  |
| PHZD2_PSEAE  | Phenazine biosynthesis protein PhzD2                      | DR97_3698 | 2.8                   | 0.0163  |
| ALR2_PSEAE   | Alanine racemase, catabolic                               | dadX      | 2.8                   | 0.0030  |
| SAHH_PSEAE   | Adenosylhomocysteinase                                    | ahcY      | 2.8                   | 0.0130  |
| SYR_PSEAE    | Arginine-tRNA ligase                                      | argS      | 2.7                   | 0.0061  |
| Q9HW49_PSEAE | Universal stress protein                                  | DR97_1527 | 2.7                   | 0.0167  |
| PVDA_PSEAE   | L-ornithine N(5)-monooxygenase                            | pvdA      | 2.7                   | 0.0067  |
| CATB_PSEAE   | Catalase B                                                | katB      | 2.6                   | 0.0035  |
| Q9HTD9_PSEAE | Alcohol dehydrogenase                                     | adhA      | 2.6                   | 0.0159  |
| Q9HVX4_PSEAE | Cytochrome D ubiquinol oxidase subunit III                | DR97_1619 | 2.6                   | 0.0034  |
| STHA_PSEAE   | Soluble pyridine nucleotide transhydrogenase              | sthA      | 2.6                   | 0.0111  |
| Q914S1_PSEAE | 17 kDa surface antigen                                    | slyB      | 2.6                   | 0.0039  |
| LEU1_PSEAE   | 2-isopropylmalate synthase                                | leuA      | 2.5                   | 0.0063  |
| Q915E2_PSEAE | 2-methylisocitrate lyase                                  | prpB      | 2.5                   | 0.0036  |
| DAPA_PSEAE   | 4-hydroxy-tetrahydrodipicolinate synthase                 | dapA_1    | 2.5                   | 0.0129  |
| PARE_PSEAE   | DNA topoisomerase 4 subunit B                             | parE      | 2.5                   | 0.0058  |
| SYFB_PSEAE   | Phenylalanine-tRNA ligase beta subunit                    | pheT      | 2.5                   | 0.0145  |
| BFR_PSEAE    | Bacterioferritin                                          | bfr1      | 2.4                   | 0.0161  |
| TOP1_PSEAE   | DNA topoisomerase 1                                       | DR97_4926 | 2.4                   | 0.0054  |
| BAUA_PSEAE   | Beta-alanine--pyruvate aminotransferase                   | aptA      | 2.4                   | 0.0170  |
| PROA_PSEAE   | Gamma-glutamyl phosphate reductase                        | proA      | 2.4                   | 0.0136  |
| Q9HUA1_PSEAE | Probable binding protein component of ABC transporter     | gltI1     | 2.4                   | 0.0156  |
| SURA_PSEAE   | Chaperone SurA                                            | surA      | 2.4                   | 0.0061  |
| PILJ_PSEAE   | Protein PilJ                                              | pilJ      | 2.4                   | 0.0163  |
| ATPG_PSEAE   | ATP synthase gamma chain                                  | atpG      | 2.4                   | 0.0162  |
| PK21A_PSEAE  | Polyphosphate:ADP/GDP phosphotransferase                  | DR97_3098 | 2.3                   | 0.0132  |
| Q9HUE1_PSEAE | ATPase nvolved in chromosome partitioning                 | DR97_2383 | 2.3                   | 0.0038  |
| G3XCT6_PSEAE | Probable two-component sensor                             | DR97_565  | 2.3                   | 0.0196  |
| Q9HT76_PSEAE | Vitamin B12-dependent ribonucleotide reductase            | nrdZ      | 2.2                   | 0.0279  |
| Q91659_PSEAE | Probable ClpA/B protease ATP binding subunit              | clpB1     | 2.2                   | 0.0165  |
| RDGC_PSEAE   | Recombination-associated protein RdgC                     | rdgC      | 2.2                   | 0.0195  |
| RS9_PSEAE    | 30S ribosomal protein S9                                  | rpsI      | 2.2                   | 0.0882  |
| Q9HZP1_PSEAE | Probable transcriptional regulator                        | icaR      | 2.2                   | 0.0060  |

| Entry name   | Protein function                                                   | STRING ID | Log <sub>2</sub> ΔLFQ | q value |
|--------------|--------------------------------------------------------------------|-----------|-----------------------|---------|
| Q912C4_PSEAE | NAD+ dependent aldehyde dehydrogenase ExaC                         | aldA3     | 2.2                   | 0.0243  |
| Q912T4_PSEAE | Probable binding protein component of ABC transporter              | DR97_69   | 2.2                   | 0.0130  |
| Q9HU13_PSEAE | ADP compounds hydrolase NudE                                       | nudE      | 2.2                   | 0.0037  |
| ASPA_PSEAE   | Aspartate ammonia-lyase                                            | aspA      | 2.2                   | 0.0112  |
| Q9HX05_PSEAE | Probable aldehyde dehydrogenase                                    | aldA1     | 2.2                   | 0.0161  |
| Q915E4_PSEAE | Probable aconitate hydratase                                       | acnD      | 2.2                   | 0.0210  |
| Q91500_PSEAE | HIT domain-containing protein                                      | DR97_978  | 2.1                   | 0.0766  |
| Q9HZ32_PSEAE | NAD(P)H nitroreductase YdjA                                        | ydjA_2    | 2.1                   | 0.0039  |
| CYSM_PSEAE   | Cysteine synthase B                                                | cysM      | 2.1                   | 0.0244  |
| PROB_PSEAE   | Glutamate 5-kinase                                                 | proB      | 2.1                   | 0.0166  |
| Q9HV73_PSEAE | Two-component response regulator CbrB                              | zraR1     | 2.1                   | 0.0967  |
| ARLY_PSEAE   | Argininosuccinate lyase                                            | argH      | 2.1                   | 0.0285  |
| PUR7_PSEAE   | Phosphoribosylaminoimidazole-succinocarboxamide synthase           | purC      | 2.1                   | 0.0386  |
| GSHB_PSEAE   | Glutathione synthetase                                             | gshB      | 2.1                   | 0.0043  |
| DAPB_PSEAE   | 4-hydroxy-tetrahydrodipicolinate reductase                         | dapB      | 2.0                   | 0.1209  |
| AROB_PSEAE   | 3-dehydroquinate synthase                                          | aroB      | 2.0                   | 0.0181  |
| Q912T8_PSEAE | Peptidylprolyl isomerase                                           | ppiD      | 2.0                   | 0.0000  |
| Q9HYR6_PSEAE | Condensation domain protein                                        | DR97_4598 | 2.0                   | 0.0054  |
| DSBA_PSEAE   | Thiol:disulfide interchange protein DsbA                           | dsbA      | 2.0                   | 0.0158  |
| PDXJ_PSEAE   | Pyridoxine 5'-phosphate synthase                                   | pdxJ      | 2.0                   | 0.0040  |
| Q9HVV5_PSEAE | Ribosomal subunit interface protein                                | raiA      | 1.9                   | 0.0139  |
| A2MGH_PSEAE  | Alpha-2-macroglobulin homolog                                      | DR97_1668 | 1.9                   | 0.0159  |
| Q91649_PSEAE | Protein phosphatase 2C domain-containing protein                   | DR97_3437 | 1.9                   | 0.0155  |
| ZIPA_PSEAE   | Cell division protein ZipA                                         | zipA      | 1.9                   | 0.0319  |
| Q913X2_PSEAE | DNA helicase                                                       | #N/A      | 1.9                   | 0.0074  |
| GYRB_PSEAE   | DNA gyrase subunit B                                               | gyrB      | 1.9                   | 0.0042  |
| Q9HVS1_PSEAE | Probable binding protein component of ABC transporter              | dppA5     | 1.9                   | 0.0057  |
| Q91171_PSEAE | Metal ABC transporter substrate-binding protein                    | DR97_6023 | 1.9                   | 0.0226  |
| Q910D5_PSEAE | AAA ATPase                                                         | DR97_5252 | 1.8                   | 0.0211  |
| ILVE_PSEAE   | Branched-chain-amino-acid aminotransferase                         | ilvE      | 1.8                   | 0.0110  |
| ARCC_PSEAE   | Carbamate kinase                                                   | arcC      | 1.8                   | 0.1213  |
| GSA_PSEAE    | Glutamate-1-semialdehyde 2,1-aminomutase                           | hemL      | 1.8                   | 0.0165  |
| Q9HVK8_PSEAE | Endopeptidase La                                                   | DR97_1880 | 1.8                   | 0.0168  |
| OBG_PSEAE    | GTPase Obg                                                         | cgtA      | 1.8                   | 0.0844  |
| Q91338_PSEAE | LTA synthase family protein                                        | DR97_198  | 1.8                   | 0.0152  |
| PUR5_PSEAE   | Phosphoribosylformylglycinamide cyclo-ligase                       | purM      | 1.7                   | 0.0164  |
| PYRG_PSEAE   | CTP synthase                                                       | pyrG      | 1.7                   | 0.0157  |
| Y3998_PSEAE  | UPF0250 protein PA3998                                             | DR97_3869 | 1.7                   | 0.0076  |
| COBW_PSEAE   | Protein CobW                                                       | cobW      | 1.7                   | 0.0355  |
| Q9HXK0_PSEAE | (R)-stereoselective amidase                                        | yafV      | 1.7                   | 0.0157  |
| Q912N2_PSEAE | Molybdate-binding periplasmic protein ModA                         | modA      | 1.7                   | 0.0135  |
| Q9HT16_PSEAE | Choline ABC transporter substrate-binding protein                  | gbuC_2    | 1.6                   | 0.0044  |
| LOLA_PSEAE   | Outer-membrane lipoprotein carrier protein                         | lolA      | 1.6                   | 0.0149  |
| BAUC_PSEAE   | Putative 3-oxopropanoate dehydrogenase                             | iolA2     | 1.6                   | 0.1390  |
| E1JGJ8_PSEAE | Peptide chain release factor 2                                     | prfB      | 1.6                   | 0.0162  |
| ARGB_PSEAE   | Acetylglutamate kinase                                             | argB      | 1.6                   | 0.0384  |
| Q91508_PSEAE | Arsenate reductase                                                 | DR97_988  | 1.6                   | 0.0140  |
| MURA_PSEAE   | UDP-N-acetylglucosamine 1-carboxyvinyltransferase                  | murA      | 1.6                   | 0.0161  |
| MTNA_PSEAE   | Methylthioribose-1-phosphate isomerase                             | mtnA      | 1.6                   | 0.0058  |
| PURA_PSEAE   | Adenylosuccinate synthetase                                        | purA      | 1.6                   | 0.0831  |
| Q7DC81_PSEAE | Phenazine biosynthesis protein PhzE                                | DR97_3697 | 1.6                   | 0.0424  |
| CLPP2_PSEAE  | ATP-dependent Clp protease proteolytic subunit 2                   | clpP2     | 1.5                   | 0.1218  |
| G3XD17_PSEAE | Thiol:disulfide interchange protein                                | dsbC      | 1.5                   | 0.1166  |
| HISZ_PSEAE   | ATP phosphoribosyltransferase regulatory subunit                   | hisZ      | 1.5                   | 0.0078  |
| RPSH_PSEAE   | RNA polymerase sigma-H factor                                      | algU      | 1.5                   | 0.0427  |
| TOLR_PSEAE   | Tol-Pal system protein TolR                                        | tolR      | 1.5                   | 0.0353  |
| Q9HWW7_PSEAE | Probable thioredoxin                                               | trx-1     | 1.4                   | 0.0172  |
| DPO1_PSEAE   | DNA polymerase I                                                   | polA      | 1.4                   | 0.1137  |
| Q9HZI4_PSEAE | MOSC domain-containing protein                                     | DR97_4915 | 1.4                   | 0.0147  |
| PCTC_PSEAE   | Methyl-accepting chemotaxis protein PctC                           | pctC      | 1.4                   | 0.0778  |
| RIBB_PSEAE   | 3,4-dihydroxy-2-butanone 4-phosphate synthase                      | ribB      | 1.4                   | 0.1137  |
| Q9HXJ3_PSEAE | Cro/C1 family transcriptional regulator                            | DR97_4065 | 1.4                   | 0.1213  |
| GCSH2_PSEAE  | Glycine cleavage system H protein 2                                | DR97_2583 | 1.4                   | 0.0614  |
| TAL_PSEAE    | Transaldolase                                                      | tal       | 1.4                   | 0.0380  |
| Q916G0_PSEAE | L-threonine dehydratase                                            | ilvA1     | 1.3                   | 0.0184  |
| Q912S7_PSEAE | Lysine-specific pyridoxal 5'-phosphate-dependent carboxylase, LdcA | adiA      | 1.3                   | 0.0388  |
| HEM6_PSEAE   | Oxygen-dependent coproporphyrinogen-III oxidase                    | hemF      | 1.3                   | 0.0347  |
| COAD_PSEAE   | Phosphopantetheine adenylyltransferase                             | coaD      | 1.3                   | 0.0163  |
| Q91748_PSEAE | EvpB family type VI secretion protein TssC                         | DR97_3041 | 1.3                   | 0.0357  |
| HIS7_PSEAE   | Imidazoleglycerol-phosphate dehydratase                            | hisB      | 1.3                   | 0.0253  |
| G3XD54_PSEAE | DNA polymerase III subunit epsilon                                 | dnaQ      | 1.2                   | 0.0727  |
| PCTA_PSEAE   | Methyl-accepting chemotaxis protein PctA                           | pctA      | 1.2                   | 0.1263  |
| Q910T0_PSEAE | Probable short-chain dehydrogenase                                 | linC_1    | 1.2                   | 0.0201  |
| Q916J5_PSEAE | Probable glutamine synthetase                                      | puuA      | 1.2                   | 0.1391  |
| Q9HVL5_PSEAE | Octaprenyl-diphosphate synthase                                    | ispB      | 1.2                   | 0.0295  |
| SYT_PSEAE    | Threonine-tRNA ligase                                              | thrS      | 1.1                   | 0.0213  |
| Q915V9_PSEAE | Glutamyl-tRNA amidotransferase                                     | DR97_3547 | 1.1                   | 0.0657  |
| Q9HW65_PSEAE | Protease                                                           | yfkm_1    | 1.1                   | 0.1338  |
| Q91348_PSEAE | Cysteine hydrolase                                                 | DR97_211  | 1.1                   | 0.0477  |
| Q91157_PSEAE | PvdL                                                               | pvdL      | 1.0                   | 0.0564  |
| Q91704_PSEAE | Alkylphosphonate utilization protein                               | DR97_3085 | 1.0                   | 0.0182  |

| Entry name   | Protein function                                                                                      | STRING ID | Log <sub>2</sub> ΔLFQ | q value |
|--------------|-------------------------------------------------------------------------------------------------------|-----------|-----------------------|---------|
| GCH1L_PSEAE  | GTP cyclohydrolase 1 type 2 homolog                                                                   | DR97_1622 | 1.0                   | 0.0283  |
| Q9HV81_PSEAE | Neutral zinc metallopeptidase                                                                         | ypfJ      | 1.0                   | 0.0457  |
| HIS3_PSEAE   | Phosphoribosyl-AMP cyclohydrolase                                                                     | hisI      | 1.0                   | 0.0445  |
| PCTB_PSEAE   | Methyl-accepting chemotaxis protein PctB                                                              | pctB      | 1.0                   | 0.1185  |
| Q9HV64_PSEAE | DUF748 domain-containing protein                                                                      | DR97_2078 | 1.0                   | 0.0474  |
| Q9HW07_PSEAE | ATP:cob                                                                                               | DR97_1577 | 0.9                   | 0.0314  |
| THIG_PSEAE   | Thiazole synthase                                                                                     | thiG      | 0.9                   | 0.1368  |
| ILVD_PSEAE   | Dihydroxy-acid dehydratase                                                                            | ilvD      | 0.9                   | 0.1385  |
| GPDA_PSEAE   | Glycerol-3-phosphate dehydrogenase [NAD(P)+]                                                          | gpsA      | 0.9                   | 0.1223  |
| Q9HZA6_PSEAE | Motility protein FimV                                                                                 | DR97_4818 | 0.9                   | 0.0169  |
| Q9HUA3_PSEAE | Proline iminopeptidase                                                                                | pip       | 0.9                   | 0.0430  |
| TRMB_PSEAE   | tRNA (guanine-N(7)-)-methyltransferase                                                                | trmB      | 0.8                   | 0.0059  |
| RSMH_PSEAE   | Ribosomal RNA small subunit methyltransferase H                                                       | rsmH      | 0.8                   | 0.0698  |
| Q9HZ19_PSEAE | CsaA protein                                                                                          | csaA      | 0.8                   | 0.1440  |
| Q9I067_PSEAE | Putative oxidoreductase                                                                               | puuB1     | 0.8                   | 0.1138  |
| Q9HY13_PSEAE | D-xylulose 5-phosphate                                                                                | DR97_4326 | 0.6                   | 0.0148  |
| SPUD_PSEAE   | Putrescine-binding periplasmic protein SpuD                                                           | potF1     | 0.6                   | 0.0338  |
| Q9HUD3_PSEAE | Malic enzyme                                                                                          | maeB      | 0.5                   | 0.0617  |
| Q9HV74_PSEAE | Two-component sensor CbrA                                                                             | cbrA      | 0.5                   | 0.0716  |
| SYGB_PSEAE   | Glycine--tRNA ligase beta subunit                                                                     | glyS      | 0.4                   | 0.1218  |
| HIS61_PSEAE  | Imidazole glycerol phosphate synthase subunit hisF1                                                   | hisF      | -0.4                  | 0.1362  |
| Q9HWI2_PSEAE | Probable acyl-CoA dehydrogenase                                                                       | DR97_3476 | -0.4                  | 0.0382  |
| Q9HX44_PSEAE | Probable acyl-CoA dehydrogenase                                                                       | aidB      | -0.6                  | 0.1433  |
| Q9HWZ2_PSEAE | FecR protein                                                                                          | DR97_3832 | -0.6                  | 0.0848  |
| PILS_PSEAE   | Sensor protein PilS                                                                                   | pilS      | -0.7                  | 0.1365  |
| Q9I4V1_PSEAE | Probable short-chain dehydrogenase                                                                    | DR97_921  | -0.7                  | 0.0727  |
| MURE_PSEAE   | UDP-N-acetylmuramoyl-L-alanyl-D-glutamate--2,6-diaminopimelate ligase                                 | murE      | -0.8                  | 0.0190  |
| PUR4_PSEAE   | Phosphoribosylformylglycinamide synthase                                                              | purL      | -0.8                  | 0.0928  |
| Q9HZ86_PSEAE | Nucleotide sugar epimerase/dehydratase WbpM                                                           | wbpM      | -0.8                  | 0.0944  |
| Q9HUM2_PSEAE | Protein HflK                                                                                          | hflK      | -0.8                  | 0.1264  |
| SYM_PSEAE    | Methionine--tRNA ligase                                                                               | metG      | -0.8                  | 0.0336  |
| Q9HZM8_PSEAE | Ribonuclease E                                                                                        | rne       | -0.9                  | 0.0180  |
| Q9HYR8_PSEAE | Probable non-ribosomal peptide synthetase                                                             | DR97_4600 | -0.9                  | 0.0610  |
| SYQ_PSEAE    | Glutamine--tRNA ligase                                                                                | glnS      | -0.9                  | 0.0579  |
| Q9HUG4_PSEAE | Glycosyltransferase                                                                                   | DR97_2356 | -1.0                  | 0.1034  |
| Q9HVV6_PSEAE | Probable ATP-binding component of ABC transporter                                                     | lptB      | -1.0                  | 0.1185  |
| Q9I6C1_PSEAE | Signal recognition particle receptor FtsY                                                             | ftsY      | -1.0                  | 0.0167  |
| Q9HXY1_PSEAE | Methionine aminopeptidase                                                                             | map1      | -1.0                  | 0.0596  |
| Q9I0Y8_PSEAE | Efflux pump membrane transporter                                                                      | bepE      | -1.0                  | 0.0084  |
| G3XD52_PSEAE | (R)-specific enoyl-CoA hydratase                                                                      | phaJ      | -1.1                  | 0.0179  |
| MASZ_PSEAE   | Malate synthase G                                                                                     | glcB      | -1.1                  | 0.1213  |
| Q9HXM5_PSEAE | Inosine-5'-monophosphate dehydrogenase                                                                | guaB      | -1.1                  | 0.1190  |
| Q9I520_PSEAE | Chain-length determining protein                                                                      | DR97_1001 | -1.1                  | 0.0349  |
| MUTL_PSEAE   | DNA mismatch repair protein MutL                                                                      | mutL      | -1.1                  | 0.0197  |
| NUOG_PSEAE   | NADH-quinone oxidoreductase subunit G                                                                 | nuoG      | -1.2                  | 0.0279  |
| Q9I031_PSEAE | Probable ATP-binding component of ABC transporter                                                     | drrA      | -1.3                  | 0.0706  |
| Q9I1U6_PSEAE | Aldehyde dehydrogenase                                                                                | DR97_6257 | -1.3                  | 0.0568  |
| Q9HXI0_PSEAE | Preprotein translocase subunit YajC                                                                   | yajC      | -1.3                  | 0.0459  |
| Q9HYB3_PSEAE | Leucyl-tRNA synthetase                                                                                | DR97_4428 | -1.3                  | 0.0160  |
| Q9I755_PSEAE | lcmF1                                                                                                 | DR97_3034 | -1.4                  | 0.0248  |
| Q9I0A7_PSEAE | Probable restriction-modification system protein                                                      | #N/A      | -1.4                  | 0.0000  |
| Q9HZ04_PSEAE | Probable glycine betaine-binding protein                                                              | gbuC_3    | -1.4                  | 0.0191  |
| AMGK_PSEAE   | N-acetylmuramate/N-acetylglucosamine kinase                                                           | DR97_3565 | -1.4                  | 0.0037  |
| Q9HU31_PSEAE | Amino acid (Lysine/arginine/ornithine/histidine/octopine) ABC transporter periplasmic binding protein | artJ      | -1.4                  | 0.0137  |
| PUR1_PSEAE   | Amidophosphoribosyltransferase                                                                        | purF      | -1.5                  | 0.0345  |
| Q9HY3_PSEAE  | Periplasmic tail-specific protease                                                                    | tsp       | -1.5                  | 0.0483  |
| Q9HU22_PSEAE | Glucose-1-phosphate thymidyltransferase                                                               | rfbA      | -1.5                  | 0.0215  |
| RLUB_PSEAE   | Ribosomal large subunit pseudouridine synthase B                                                      | rluB      | -1.7                  | 0.0160  |
| Q9HTL9_PSEAE | Enamine/imine deaminase                                                                               | yabJ_5    | -1.8                  | 0.0134  |
| Q9HUG0_PSEAE | Probable carbamoyl transferase                                                                        | novN_1    | -1.9                  | 0.0724  |
| Q9I0Z1_PSEAE | Oxidoreductase MexS                                                                                   | DR97_5681 | -2.2                  | 0.0108  |
| ACSA2_PSEAE  | Acetyl-coenzyme A synthetase 2                                                                        | acsB      | -2.2                  | 0.0351  |
| Q9HTT1_PSEAE | Uncharacterized protein                                                                               | DR97_2640 | -2.3                  | 0.0317  |
| Q9HTY1_PSEAE | Inorganic triphosphatase                                                                              | DR97_2578 | -2.3                  | 0.0316  |
| Y587_PSEAE   | UPF0229 protein PA0587                                                                                | DR97_3556 | -2.3                  | 0.0035  |
| Q9I179_PSEAE | Probable non-ribosomal peptide synthetase                                                             | pvdI      | -2.4                  | 0.0000  |
| COQ7_PSEAE   | 2-nonaprenyl-3-methyl-6-methoxy-1,4-benzoquinol hydroxylase                                           | coq7      | -2.4                  | 0.0335  |
| DCTP_PSEAE   | C4-dicarboxylate-binding periplasmic protein DctP                                                     | dctP1     | -2.5                  | 0.0848  |
| Q9I5F9_PSEAE | Lon protease                                                                                          | lon2      | -2.6                  | 0.0502  |
| Q9I246_PSEAE | Probable carbamoyl transferase                                                                        | DR97_5777 | -2.6                  | 0.0178  |
| ALGR_PSEAE   | Positive alginate biosynthesis regulatory protein                                                     | algR      | -2.7                  | 0.0829  |
| Q9I2F8_PSEAE | Binding protein component of ABC ribose transporter                                                   | rbkB      | -3.1                  | 0.0388  |
| Q9HU89_PSEAE | Probable ATP-binding component of ABC transporter                                                     | opuAA     | -3.3                  | 0.0036  |
| Q9HTT8_PSEAE | Heme biosynthesis protein HemY                                                                        | hemY      | -3.4                  | 0.0192  |
| Q9HTF4_PSEAE | GbcA                                                                                                  | gbcA      | -3.4                  | 0.0031  |
| SYFA_PSEAE   | Phenylalanine--tRNA ligase alpha subunit                                                              | pheS      | -3.8                  | 0.0106  |
| HUTU_PSEAE   | Urocanate hydratase                                                                                   | hutU      | -4.7                  | 0.0000  |
| Q9I612_PSEAE | Probable acyl-CoA dehydrogenase                                                                       | DR97_3474 | -5.1                  | 0.0000  |
| Q9HU5_PSEAE  | Mg(2+) transport ATPase, P-type 2                                                                     | mgtA      | -5.2                  | 0.0116  |

| Entry name   | Protein function        | STRING ID | Log <sub>2</sub> ΔLFQ | q value |
|--------------|-------------------------|-----------|-----------------------|---------|
| Q915U9_PSEAE | PrkA AAA domain protein | yeaG      | -5.7                  | 0.0000  |
| Q912R2_PSEAE | Probable oxidoreductase | yhfP      | -5.7                  | 0.0000  |

**Table S9:** Differentially express *S. aureus* proteins (Student's *t*-test, FDR 0.15) in co-culture vs. monoculture surfaceome.

| Entry name      | Protein function                                                                                  | STRING ID  | Log <sub>2</sub> ΔLFQ | q value |
|-----------------|---------------------------------------------------------------------------------------------------|------------|-----------------------|---------|
| WP_000792567.1  | immunoglobulin-binding protein sbi                                                                | sbi        | 1.3                   | 0.0099  |
| WP_0001133953.1 | 30S ribosomal protein S1                                                                          | rpsA       | 0.6                   | 0.0199  |
| WP_000863437.1  | dihydropolyllysine-residue acetyltransferase component of pyruvate dehydrogenase complex          | pdhC       | 0.3                   | 0.0564  |
| WP_000391030.1  | cell division protein FtsA                                                                        | ftsA       | 0.2                   | 0.0481  |
| WP_000808968.1  | 50S ribosomal protein L31 type B                                                                  | rpmE2      | 0.2                   | 0.0793  |
| WP_000035325.1  | pyruvate dehydrogenase E1 component subunit alpha                                                 | pdhA       | -0.2                  | 0.0401  |
| WP_001083335.1  | 2-deoxyribose-5-phosphate aldolase                                                                | deoC2      | -0.3                  | 0.0525  |
| WP_000723304.1  | UDP-glucose 4-epimerase                                                                           | AID39048.1 | -0.4                  | 0.0071  |
| WP_0011130051.1 | malate:quinone oxidoreductase                                                                     | AID41318.1 | -0.4                  | 0.0027  |
| WP_000863556.1  | superoxide dismutase [Mn/Fe] 1 SodA                                                               | sodA       | -0.5                  | 0.0026  |
| WP_001074619.1  | 50S ribosomal protein L1                                                                          | rplA       | -0.6                  | 0.0025  |
| WP_000460244.1  | peptide chain release factor 1                                                                    | prfA       | -0.6                  | 0.0025  |
| WP_000002746.1  | 3-oxoacyl-ACP reductase                                                                           | butA       | -0.7                  | 0.0026  |
| WP_001206107.1  | aldehyde dehydrogenase family protein                                                             | AID40808.1 | -0.7                  | 0.0009  |
| WP_000888997.1  | cell division protein FtsZ                                                                        | ftsZ       | -0.8                  | 0.0094  |
| WP_000457386.1  | 50S ribosomal protein L21                                                                         | rplU       | -0.8                  | 0.0000  |
| WP_000116227.1  | class II fumarate hydratase                                                                       | fumC       | -0.8                  | 0.1111  |
| WP_001137495.1  | 30S ribosomal protein S7                                                                          | rpsG       | -0.9                  | 0.0046  |
| WP_000911041.1  | rod shape-determining protein MreC                                                                | AID40117.1 | -0.9                  | 0.0013  |
| WP_000057594.1  | cysteine synthase                                                                                 | cysK       | -0.9                  | 0.0019  |
| WP_000737711.1  | hypothetical membrane lipoprotein                                                                 | AID41063.1 | -1.0                  | 0.0419  |
| WP_000091975.1  | 50S ribosomal protein L6                                                                          | rplF       | -1.0                  | 0.0000  |
| WP_001033875.1  | 5'-nucleotidase, lipoprotein e(P4) family                                                         | AID38732.1 | -1.0                  | 0.0299  |
| WP_000161314.1  | glucokinase                                                                                       | glcK       | -1.0                  | 0.0016  |
| WP_000975347.1  | glycosyltransferase family 2 protein                                                              | AID38679.1 | -1.0                  | 0.0112  |
| WP_000044796.1  | aspartate--tRNA ligase                                                                            | aspS       | -1.0                  | 0.0009  |
| WP_000572877.1  | adenylosuccinate lyase                                                                            | purB       | -1.0                  | 0.0093  |
| WP_000095328.1  | adenylosuccinate synthetase                                                                       | purA       | -1.0                  | 0.0038  |
| WP_000836472.1  | rhodanese-like domain-containing protein                                                          | AID40229.1 | -1.0                  | 0.0026  |
| WP_001115431.1  | dihydropolyllysine-residue succinyltransferase component of 2-oxoglutarate dehydrogenase complex  | odhB       | -1.0                  | 0.0071  |
| WP_000933956.1  | DNA-directed RNA polymerase subunit omega                                                         | rpoZ       | -1.0                  | 0.0059  |
| WP_000255583.1  | DNA gyrase subunit B                                                                              | gyrB       | -1.1                  | 0.0016  |
| WP_000811375.1  | ribonuclease J 1                                                                                  | rnj1       | -1.2                  | 0.0000  |
| WP_000129413.1  | arginine deiminase                                                                                | arcA       | -1.2                  | 0.0000  |
| WP_000670755.1  | FAA hydrolase family protein                                                                      | AID39404.1 | -1.2                  | 0.0000  |
| WP_000492114.1  | UPF0365 family protein                                                                            | AID40039.1 | -1.2                  | 0.0005  |
| WP_001049957.1  | peptide chain release factor 3                                                                    | prfC       | -1.2                  | 0.0439  |
| WP_000769416.1  | D-alanyl-lipoteichoic acid biosynthesis protein DltD                                              | dltD       | -1.2                  | 0.0026  |
| WP_000722165.1  | bifunctional phosphopantothenoylcysteine decarboxylase/phosphopantothenate--cysteine ligase CoaBC | AID39651.1 | -1.2                  | 0.0032  |
| WP_000105070.1  | glucose-6-phosphate dehydrogenase                                                                 | zwf        | -1.2                  | 0.0000  |
| AIO22395.1      | p_multicopper oxidase                                                                             | #N/A       | -1.2                  | 0.0000  |
| WP_001006454.1  | cysteine desulfurase                                                                              | AID39352.1 | -1.2                  | 0.0016  |
| WP_001021468.1  | adenylate kinase                                                                                  | adk        | -1.3                  | 0.0122  |
| WP_000064078.1  | DNA-binding response regulator                                                                    | srrA       | -1.3                  | 0.0208  |
| WP_000690439.1  | pyridoxal 5'-phosphate synthase glutaminase subunit PdxT                                          | pdxT       | -1.3                  | 0.0000  |
| WP_000240920.1  | hypothetical membrane protein                                                                     | tarL       | -1.3                  | 0.0019  |
| WP_001010762.1  | cytochrome ubiquinol oxidase subunit I                                                            | qoxB       | -1.3                  | 0.0000  |
| WP_000673317.1  | glycine glycytransferase FemA                                                                     | femA       | -1.3                  | 0.0017  |
| WP_000514375.1  | nitrate reductase subunit alpha                                                                   | narG       | -1.3                  | 0.0019  |
| WP_001289711.1  | uncharacterized N-acetyltransferase protein                                                       | AID39615.1 | -1.3                  | 0.0000  |
| WP_001074405.1  | Fe-S cluster assembly protein SufB                                                                | AID39354.1 | -1.3                  | 0.0063  |
| WP_000808894.1  | aldo/keto reductase                                                                               | AID39107.1 | -1.4                  | 0.0000  |
| WP_001180212.1  | NADP-dependent oxidoreductase                                                                     | AID40881.1 | -1.4                  | 0.0000  |
| WP_000956150.1  | SMC family protein                                                                                | AID38875.1 | -1.4                  | 0.0205  |
| WP_000136257.1  | thiol peroxidase Tpx                                                                              | tpx        | -1.4                  | 0.0016  |
| WP_001147955.1  | thioredoxin                                                                                       | AID39315.1 | -1.4                  | 0.0013  |
| WP_000684568.1  | octopine dehydrogenase                                                                            | AID40990.1 | -1.4                  | 0.0006  |
| WP_000217452.1  | SDR family oxidoreductase                                                                         | AID41172.1 | -1.4                  | 0.0000  |
| WP_000757543.1  | MarR family transcriptional regulator                                                             | rot        | -1.4                  | 0.0035  |
| WP_000648118.1  | YtxH domain-containing protein                                                                    | AID40309.1 | -1.4                  | 0.0019  |
| WP_000066379.1  | 3-deoxy-7-phosphoheptulonate synthase                                                             | AID40207.1 | -1.4                  | 0.0000  |
| WP_000711897.1  | signal peptidase IB (spsB)                                                                        | spsB       | -1.4                  | 0.0016  |
| WP_001117071.1  | cell division protein DivIVA                                                                      | AID39631.1 | -1.4                  | 0.0000  |
| WP_001794472.1  | quinone oxidoreductase                                                                            | AID41065.1 | -1.4                  | 0.0000  |
| WP_001227718.1  | PTS glucose EIIcBA component                                                                      | ptsG       | -1.4                  | 0.0000  |
| WP_001185462.1  | hydroxymethylpyrimidine/phosphomethylpyrimidine kinase                                            | AID39077.1 | -1.4                  | 0.0081  |
| WP_000390829.1  | sigma-B regulation protein serine phosphatase RsbU                                                | AID40753.1 | -1.5                  | 0.0000  |

| Entry name     | Protein function                                                      | STRING ID  | Log <sub>2</sub> ΔLFQ | q value |
|----------------|-----------------------------------------------------------------------|------------|-----------------------|---------|
| WP_000150173.1 | UDP-N-acetylmuramate--L-alanine ligase                                | murC       | -1.5                  | 0.0016  |
| WP_000897132.1 | ATP-dependent Clp protease ATP-binding subunit ClpC                   | clpC       | -1.5                  | 0.0000  |
| WP_000701483.1 | DNA-directed RNA polymerase subunit delta                             | rpoE       | -1.5                  | 0.0000  |
| WP_001048374.1 | DUF4479 and tRNA_bind_bactPheRS domain-containing protein             | AID40213.1 | -1.5                  | 0.0000  |
| WP_000610203.1 | ribitol-5-phosphate dehydrogenase                                     | tarJ       | -1.5                  | 0.0009  |
| WP_000040067.1 | acetate kinase                                                        | ackA       | -1.5                  | 0.0000  |
| WP_000259736.1 | molybdopterin molybdenumtransferase                                   | moeA       | -1.5                  | 0.0005  |
| WP_000240651.1 | molecular chaperone GroEL                                             | groL       | -1.5                  | 0.0000  |
| WP_001118708.1 | nitrite reductase large subunit                                       | nasD       | -1.6                  | 0.0026  |
| WP_000110252.1 | succinyl-CoA ligase subunit alpha                                     | sucD       | -1.6                  | 0.0000  |
| WP_000754458.1 | hypothetical membrane Fe-transport lipoprotein                        | AID39244.1 | -1.6                  | 0.0006  |
| WP_000199080.1 | acetyl-CoA acyltransferase                                            | AID38845.1 | -1.6                  | 0.0009  |
| WP_001250339.1 | Mur ligase family protein                                             | AID40431.1 | -1.6                  | 0.0000  |
| WP_001068529.1 | aminotransferase class I/II-fold pyridoxal phosphate-dependent enzyme | AID40480.1 | -1.6                  | 0.0009  |
| WP_000181322.1 | 6-phosphogluconolactonase                                             | AID40465.1 | -1.6                  | 0.0000  |
| WP_000257888.1 | DUF1447 family protein                                                | AID39527.1 | -1.6                  | 0.0000  |
| WP_000011827.1 | Putative N-acetyltransferase YedL/Putative exported protein           | AID39783.1 | -1.6                  | 0.0000  |
| WP_000426914.1 | acyl carrier protein                                                  | acpP       | -1.6                  | 0.0771  |
| WP_000047355.1 | malonyl CoA-ACP transacylase                                          | fabD       | -1.6                  | 0.0000  |
| WP_001050913.1 | ribonuclease Y                                                        | rny        | -1.6                  | 0.0000  |
| WP_038413163.1 | collagen adhesin                                                      | AID41408.1 | -1.6                  | 0.0013  |
| WP_000367420.1 | BrxA/BrxB family bacilliredoxin                                       | AID39979.1 | -1.6                  | 0.0000  |
| WP_000411087.1 | D-alanine aminotransferase                                            | dat        | -1.6                  | 0.0025  |
| WP_000751265.1 | transglycosylase IsaA                                                 | isaA       | -1.6                  | 0.0000  |
| WP_000866426.1 | glucosamine-6-phosphate deaminase                                     | nagB       | -1.6                  | 0.0009  |
| WP_000969811.1 | DNA polymerase III subunit beta                                       | dnaN       | -1.6                  | 0.0000  |
| WP_000004981.1 | Adenosine 5'-monophosphoramidase                                      | AID40308.1 | -1.7                  | 0.0000  |
| WP_001138360.1 | 50S ribosomal protein L20                                             | rpIT       | -1.7                  | 0.0063  |
| WP_000677261.1 | FMN-dependent NADPH-azoreductase                                      | azo1       | -1.7                  | 0.0000  |
| WP_001059082.1 | cold-shock protein CspC                                               | AID39302.1 | -1.7                  | 0.0000  |
| WP_000134779.1 | DUF1292 domain-containing protein                                     | AID40084.1 | -1.7                  | 0.0009  |
| WP_000818278.1 | succinate dehydrogenase flavoprotein subunit                          | sdhA       | -1.7                  | 0.0000  |
| WP_000134963.1 | thioredoxin reductase TrxB                                            | trxB       | -1.7                  | 0.0000  |
| WP_000277155.1 | hypothetical multicopper oxidase protein                              | #N/A       | -1.7                  | 0.0016  |
| WP_000623906.1 | DAK2 domain-containing protein                                        | AID39667.1 | -1.7                  | 0.0026  |
| WP_000448898.1 | alpha/beta hydrolase                                                  | AID41272.1 | -1.7                  | 0.0009  |
| WP_000532966.1 | YebC/PmpR family DNA-binding transcriptional regulator                | AID39177.1 | -1.7                  | 0.0084  |
| WP_000138342.1 | penicillin-binding protein 2                                          | pbp2       | -1.8                  | 0.0084  |
| WP_000611456.1 | UDP-N-acetylmuramoyl-tripeptide--D-alanyl-D-alanine ligase            | murF       | -1.8                  | 0.0013  |
| WP_001041575.1 | heme uptake protein IsdB                                              | isdB       | -1.8                  | 0.0013  |
| WP_000884337.1 | serine--tRNA ligase                                                   | serS       | -1.8                  | 0.0079  |
| WP_000673098.1 | glycine glycytransferase FemB                                         | femB       | -1.8                  | 0.0016  |
| WP_000129645.1 | D-alanine--poly(phosphoribitol) ligase                                | dltA       | -1.8                  | 0.0000  |
| WP_001055897.1 | XRE family transcriptional regulator                                  | AID38865.1 | -1.8                  | 0.0009  |
| WP_001792529.1 | LytR-Cps2A-Psr (LCP) family transcriptional regulator                 | AID40999.1 | -1.8                  | 0.0006  |
| WP_000058389.1 | NAD-dependent malic enzyme 4                                          | AID40171.1 | -1.8                  | 0.0009  |
| WP_001018928.1 | thioredoxin TrxA                                                      | trxA       | -1.8                  | 0.0000  |
| WP_000547687.1 | 50S ribosomal protein L24                                             | rplX       | -1.8                  | 0.0192  |
| WP_000631982.1 | cysteine--tRNA ligase                                                 | cysS       | -1.8                  | 0.0000  |
| WP_001125210.1 | 2,3-bisphosphoglycerate-dependent phosphoglycerate mutase             | gpmA       | -1.8                  | 0.0000  |
| WP_000197806.1 | phosphopentomutase                                                    | deoB       | -1.8                  | 0.0016  |
| WP_000551283.1 | hypoxanthine-guanine phosphoribosyltransferase                        | hpt        | -1.8                  | 0.0000  |
| WP_001286320.1 | cell division regulator GpsB                                          | gpsB       | -1.9                  | 0.0000  |
| WP_001085498.1 | 2,3-bisphosphoglycerate-independent phosphoglycerate mutase           | gpmI       | -1.9                  | 0.0000  |
| WP_000786119.1 | YhgE/Pip domain-containing protein                                    | AID41355.1 | -1.9                  | 0.0000  |
| WP_000160304.1 | purine-nucleoside phosphorylase                                       | AID40824.1 | -1.9                  | 0.0000  |
| WP_000201875.1 | lipoyl synthase                                                       | AID39361.1 | -1.9                  | 0.0000  |
| WP_000569649.1 | DNA-directed RNA polymerase subunit alpha                             | rpoA       | -1.9                  | 0.0400  |
| WP_000290401.1 | aldehyde dehydrogenase                                                | aldA       | -1.9                  | 0.0400  |
| WP_000334506.1 | VOC family protein                                                    | AID39871.1 | -1.9                  | 0.0000  |
| WP_000172190.1 | hydroxymethylglutaryl-CoA synthase                                    | mvaS       | -1.9                  | 0.0078  |
| WP_000120494.1 | serine hydroxymethyltransferase                                       | glyA       | -2.0                  | 0.0000  |
| WP_000649898.1 | glutamate ABC transporter permease                                    | AID40328.1 | -2.0                  | 0.0000  |
| WP_001801513.1 | anti-sigma B factor RsbW                                              | rsbW       | -2.0                  | 0.0009  |
| WP_000035058.1 | peptidyl-prolyl cis-trans isomerase                                   | AID39390.1 | -2.0                  | 0.0000  |
| WP_001031407.1 | class I fructose-bisphosphate aldolase                                | fda        | -2.0                  | 0.0000  |
| WP_001093552.1 | hypothetical membrane lipoprotein                                     | AID39217.1 | -2.0                  | 0.0000  |
| WP_000066056.1 | argininosuccinate lyase                                               | argH       | -2.0                  | 0.0005  |
| WP_001557601.1 | HIRAN-domain-containing restriction endonuclease                      | AID38752.1 | -2.0                  | 0.0009  |
| WP_000819098.1 | DNA gyrase subunit A                                                  | gyrA       | -2.0                  | 0.0000  |
| WP_001283055.1 | RNA polymerase sigma factor SigA                                      | rpoD       | -2.0                  | 0.0026  |
| WP_000159960.1 | CTP synthetase                                                        | pyrG       | -2.0                  | 0.0000  |
| WP_000170162.1 | Asp-tRNA(Asn)/Glu-tRNA(Gln) amidotransferase GatCAB subunit C         | gatC       | -2.0                  | 0.0000  |
| WP_000782130.1 | foldase protein PrsA                                                  | prsA       | -2.0                  | 0.0016  |
| WP_000825817.1 | alkaline shock response membrane anchor protein AmaP                  | AID40877.1 | -2.0                  | 0.0009  |
| WP_000589549.1 | arsenate reductase family protein                                     | AID39316.1 | -2.0                  | 0.0000  |
| WP_001266540.1 | PTS fructose transporter subunit IIC                                  | fruA       | -2.0                  | 0.0000  |
| WP_000863474.1 | signal recognition particle protein                                   | ffh        | -2.0                  | 0.0000  |
| WP_000669728.1 | protein MAP                                                           | AID40482.1 | -2.1                  | 0.0000  |
| WP_000976253.1 | dihydroxyacetone kinase subunit DhaK                                  | AID39158.1 | -2.1                  | 0.0000  |



| Entry name     | Protein function                                                                | STRING ID  | Log <sub>2</sub> ΔLFQ | q value |
|----------------|---------------------------------------------------------------------------------|------------|-----------------------|---------|
| WP_000277421.1 | dihydroorotate dehydrogenase (quinone)                                          | AID41301.1 | -2.1                  | 0.0000  |
| WP_000241346.1 | ATP synthase subunit delta                                                      | atpH       | -2.1                  | 0.0025  |
| WP_000279414.1 | Glyceraldehyde-3-phosphate dehydrogenase 1                                      | gapA1      | -2.1                  | 0.0000  |
| WP_000913317.1 | peptide-methionine (R)-S-oxide reductase                                        | mnrB       | -2.1                  | 0.0000  |
| WP_000496092.1 | GTPase ObgE                                                                     | obg        | -2.1                  | 0.0000  |
| WP_001791219.1 | translation initiation factor IF-3                                              | infC       | -2.1                  | 0.0000  |
| WP_001155271.1 | formate dehydrogenase subunit alpha                                             | fdhF       | -2.1                  | 0.0000  |
| WP_000067112.1 | N-acetyltransferase                                                             | AID41211.1 | -2.1                  | 0.0000  |
| WP_000413875.1 | lipid II:glycine glycytransferase FemX                                          | femX       | -2.1                  | 0.0000  |
| WP_000521495.1 | phosphoglucosamine mutase                                                       | glmM       | -2.1                  | 0.0000  |
| WP_000192183.1 | fructose 1,6-bisphosphatase                                                     | fbp        | -2.1                  | 0.0000  |
| WP_001280006.1 | ribosome-recycling factor                                                       | frr        | -2.1                  | 0.0000  |
| WP_000138487.1 | NAD-specific glutamate dehydrogenase                                            | gluD       | -2.1                  | 0.0000  |
| WP_000974881.1 | ATP synthase subunit alpha                                                      | atpA       | -2.1                  | 0.0000  |
| WP_000259692.1 | L-glutamate gamma-semialdehyde dehydrogenase                                    | rocA       | -2.1                  | 0.0000  |
| WP_000481438.1 | transketolase                                                                   | tkt        | -2.1                  | 0.0000  |
| WP_001213992.1 | YbaB/Ebfc family nucleoid-associated protein                                    | AID38970.1 | -2.1                  | 0.0035  |
| WP_000867193.1 | dihydroxyacetone kinase subunit L                                               | AID39159.1 | -2.2                  | 0.0000  |
| WP_001140871.1 | manganese-dependent inorganic pyrophosphatase                                   | ppaC       | -2.2                  | 0.0000  |
| WP_000334466.1 | glutamine--fructose-6-phosphate aminotransferase                                | glmS       | -2.2                  | 0.0000  |
| WP_000911657.1 | pyruvate formate-lyase-activating enzyme                                        | pflA       | -2.2                  | 0.0000  |
| WP_001240826.1 | ESAT-6 secretion system extracellular protein A                                 | esxA       | -2.2                  | 0.0063  |
| WP_000093347.1 | aminomethyltransferase                                                          | gcvT       | -2.2                  | 0.0000  |
| WP_000382892.1 | lantibiotic ABC transporter ATP-binding protein                                 | AID41204.1 | -2.2                  | 0.0000  |
| WP_000157603.1 | ATP synthase subunit gamma                                                      | atpG       | -2.2                  | 0.0000  |
| WP_001283784.1 | glutamate--tRNA ligase                                                          | gltX       | -2.2                  | 0.0000  |
| WP_000608835.1 | iron-sulfur cluster repair di-iron protein ScdA                                 | scdA       | -2.2                  | 0.0000  |
| WP_000034716.1 | molecular chaperone DnaK                                                        | dnaK       | -2.2                  | 0.0000  |
| WP_000431312.1 | transcription elongation factor GreA                                            | greA       | -2.2                  | 0.0000  |
| WP_000169223.1 | 6-phospho-beta-galactosidase                                                    | lacG       | -2.2                  | 0.0016  |
| WP_000958522.1 | chromosome partitioning protein ParA                                            | AID40854.1 | -2.2                  | 0.0000  |
| WP_001279341.1 | PDZ domain-containing protein                                                   | AID40197.1 | -2.2                  | 0.0000  |
| WP_000101976.1 | DNA-binding response regulator                                                  | walR       | -2.2                  | 0.0000  |
| WP_000626504.1 | elongation factor P                                                             | efp        | -2.2                  | 0.0000  |
| WP_000379051.1 | HslU--HslV peptidase ATPase subunit                                             | hslU       | -2.3                  | 0.0000  |
| WP_000734077.1 | alanine--tRNA ligase                                                            | alaS       | -2.3                  | 0.0000  |
| WP_000813536.1 | pyruvate decarboxylase                                                          | AID38614.1 | -2.3                  | 0.0017  |
| WP_001261460.1 | 30S ribosomal protein S6                                                        | rpsF       | -2.3                  | 0.0000  |
| WP_001228158.1 | alpha/beta hydrolase                                                            | AID41225.1 | -2.3                  | 0.0000  |
| WP_000219068.1 | catabolite control protein A                                                    | ccpA       | -2.3                  | 0.0000  |
| WP_000729731.1 | aconitate hydratase                                                             | acnA       | -2.3                  | 0.0000  |
| WP_000250820.1 | 2-amino-3-ketobutyrate CoA ligase                                               | AID39045.1 | -2.3                  | 0.0000  |
| WP_000205576.1 | Fe-S cluster assembly protein SufD                                              | AID39351.1 | -2.3                  | 0.0000  |
| WP_000872486.1 | 2-C-methyl-D-erythritol 4-phosphate cytidyltransferase                          | tarI       | -2.3                  | 0.0000  |
| WP_000163281.1 | type 1 glutamine amidotransferase                                               | AID40346.1 | -2.4                  | 0.0000  |
| WP_000160914.1 | undecaprenyldiphospho-muramoylpentapeptide beta-N-acetylglucosaminyltransferase | murG       | -2.4                  | 0.0000  |
| WP_001051856.1 | YtxH domain-containing protein                                                  | AID40224.1 | -2.4                  | 0.0000  |
| WP_000265408.1 | dipeptidase PepV                                                                | AID40223.1 | -2.4                  | 0.0000  |
| WP_000545373.1 | Asp-tRNA(Asn)/Glu-tRNA(Gln) amidotransferase GatCAB subunit B                   | gatB       | -2.4                  | 0.0016  |
| WP_000019697.1 | aminomethyl-transferring glycine dehydrogenase                                  | gcvPA      | -2.4                  | 0.0019  |
| WP_000167269.1 | 3-oxoacyl-[acyl-carrier-protein] reductase                                      | fabG       | -2.4                  | 0.0000  |
| WP_000782741.1 | molybdate ABC transporter substrate-binding protein                             | modA       | -2.4                  | 0.0000  |
| WP_001011603.1 | glutamate-1-semialdehyde 2,1-aminomutase                                        | hemL2      | -2.4                  | 0.0006  |
| WP_001274017.1 | 30S ribosomal protein S20                                                       | rpsT       | -2.4                  | 0.0000  |
| WP_000182215.1 | nucleotide exchange factor GrpE                                                 | grpE       | -2.4                  | 0.0000  |
| WP_001051120.1 | methionine--tRNA ligase                                                         | metG       | -2.5                  | 0.0000  |
| WP_000184947.1 | 1,4-dihydroxy-2-naphthoyl-CoA synthase                                          | menB       | -2.5                  | 0.0000  |
| WP_000668822.1 | lipoate--protein ligase A                                                       | AID39465.1 | -2.5                  | 0.0000  |
| WP_000277602.1 | universal stress protein                                                        | AID40175.1 | -2.5                  | 0.0097  |
| WP_001062173.1 | DEAD/DEAH box family ATP-dependent RNA helicase CshB                            | cshB       | -2.5                  | 0.0000  |
| WP_000717560.1 | ATP-dependent 6-phosphofructokinase                                             | pfkA       | -2.5                  | 0.0000  |
| WP_000933774.1 | ribose-phosphate pyrophosphokinase                                              | prs        | -2.5                  | 0.0009  |
| WP_001269643.1 | pur operon repressor                                                            | purR       | -2.6                  | 0.0000  |
| WP_000154506.1 | 3-hydroxyacyl-CoA dehydrogenase                                                 | AID38649.1 | -2.6                  | 0.0000  |
| WP_001096494.1 | transaldolase                                                                   | AID40252.1 | -2.6                  | 0.0000  |
| WP_001062662.1 | pyruvate oxidase CidC                                                           | AID41229.1 | -2.6                  | 0.0000  |
| WP_000689997.1 | alanine dehydrogenase                                                           | ald2       | -2.6                  | 0.0000  |
| WP_000425358.1 | valine--tRNA ligase                                                             | valS       | -2.6                  | 0.0000  |
| WP_000395692.1 | D-alanine--poly(phosphoribitol) ligase subunit 2                                | dltC       | -2.6                  | 0.0000  |
| WP_000916187.1 | 50S ribosomal protein L27                                                       | rpmA       | -2.6                  | 0.0026  |
| WP_000825937.1 | amino acid ABC transporter substrate-binding protein                            | AID41110.1 | -2.6                  | 0.0000  |
| WP_001038301.1 | DNA polymerase I                                                                | polA       | -2.6                  | 0.0000  |
| WP_000140675.1 | ATP synthase subunit B                                                          | atpF       | -2.6                  | 0.0000  |
| WP_000082722.1 | oligoendopeptidase F                                                            | AID39438.1 | -2.6                  | 0.0000  |
| WP_000422864.1 | 3-hexulose-6-phosphate synthase                                                 | AID39068.1 | -2.6                  | 0.0000  |
| WP_000166055.1 | fatty acid-binding protein DegV                                                 | AID39887.1 | -2.7                  | 0.0000  |
| WP_001226833.1 | urocanate hydratase                                                             | hutU       | -2.7                  | 0.0000  |
| WP_001791353.1 | putative heat induced stress protein                                            | AID38877.1 | -2.7                  | 0.0000  |
| WP_00004086.1  | 30S ribosomal protein S17                                                       | rpsQ       | -2.7                  | 0.0000  |
| WP_000562498.1 | class 1b ribonucleoside-diphosphate reductase subunit beta                      | nrdF       | -2.7                  | 0.0000  |
| WP_000290491.1 | glycine cleavage system protein H                                               | gcvH       | -2.7                  | 0.0000  |

| Entry name      | Protein function                                                                             | STRING ID  | Log <sub>2</sub> ΔLFQ | q value |
|-----------------|----------------------------------------------------------------------------------------------|------------|-----------------------|---------|
| WP_001196351.1  | proline dehydrogenase                                                                        | AID40238.1 | -2.7                  | 0.0000  |
| WP_000584639.1  | DNA double-strand break repair Rad50 ATPase                                                  | AID40313.1 | -2.8                  | 0.0000  |
| WP_000193707.1  | phosphogluconate dehydrogenase (NADP(+)-dependent, decarboxylating)                          | gnd        | -2.8                  | 0.0000  |
| WP_000244860.1  | septation ring formation regulator EzrA                                                      | ezrA       | -2.8                  | 0.0000  |
| WP_000081181.1  | beta-ketoacyl-[acyl-carrier-protein] synthase II                                             | fabF       | -2.8                  | 0.0000  |
| WP_000186043.1  | tyrosine--tRNA ligase                                                                        | tyrS       | -2.8                  | 0.0000  |
| WP_000930503.1  | alkyl hydroperoxide reductase subunit F                                                      | ahpF       | -2.8                  | 0.0000  |
| WP_000791398.1  | uncharacterized leukocidin-like protein 2                                                    | AID40551.1 | -2.8                  | 0.0000  |
| WP_000076025.1  | branched chain amino acid aminotransferase                                                   | ilvE       | -2.8                  | 0.0000  |
| WP_000159638.1  | D-alanine--D-alanine ligase                                                                  | ddl        | -2.9                  | 0.0000  |
| WP_000491755.1  | DUF47 domain-containing protein                                                              | AID39171.1 | -2.9                  | 0.0000  |
| WP_000109909.1  | phosphoenolpyruvate carboxykinase (ATP)                                                      | pckA       | -2.9                  | 0.0009  |
| WP_077670284.1  | MSCRAMM family adhesin SdrC                                                                  | sdrC       | -2.9                  | 0.0017  |
| WP_001232655.1  | pyruvate kinase                                                                              | pyk        | -2.9                  | 0.0000  |
| WP_000942303.1  | ABC transporter ATP-binding protein                                                          | AID39848.1 | -2.9                  | 0.0000  |
| WP_000985472.1  | 50S ribosomal protein L2                                                                     | rplB       | -2.9                  | 0.0381  |
| WP_000435132.1  | threonine--tRNA ligase                                                                       | thrS       | -2.9                  | 0.0000  |
| WP_001283444.1  | MarR family transcriptional regulator                                                        | rat        | -3.0                  | 0.0000  |
| WP_000473654.1  | glucose-specific phosphotransferase enzyme IIA component                                     | crr        | -3.0                  | 0.0000  |
| WP_000043642.1  | translation initiation factor IF-2                                                           | infB       | -3.0                  | 0.0000  |
| WP_000814087.1  | proline--tRNA ligase                                                                         | proS       | -3.0                  | 0.0017  |
| WP_000057330.1  | UMP kinase                                                                                   | pyrH       | -3.0                  | 0.0000  |
| WP_001108721.1  | leucine--tRNA ligase                                                                         | leuS       | -3.0                  | 0.0000  |
| WP_000202178.1  | glycine dehydrogenase                                                                        | gcvPB      | -3.0                  | 0.0000  |
| WP_001115101.1  | transcription termination factor Rho                                                         | rho        | -3.1                  | 0.0000  |
| WP_000090796.1  | 30S ribosomal protein S13                                                                    | rpsM       | -3.1                  | 0.0000  |
| WP_000160848.1  | iron-regulated surface determinant protein A (IsdA)                                          | isdA       | -3.1                  | 0.0000  |
| WP_000046076.1  | NADH dehydrogenase                                                                           | AID39377.1 | -3.1                  | 0.0000  |
| WP_000027924.1  | Asp-tRNA(Asn)/Glu-tRNA(Gln) amidotransferase GatCAB subunit A                                | gatA       | -3.1                  | 0.0026  |
| WP_000955797.1  | bifunctional acetaldehyde-CoA/alcohol dehydrogenase                                          | adhE       | -3.1                  | 0.0000  |
| WP_000182648.1  | translational GTPase TypA                                                                    | AID39546.1 | -3.1                  | 0.0000  |
| WP_001273085.1  | 50S ribosomal protein L10                                                                    | rplJ       | -3.1                  | 0.0026  |
| WP_000048712.1  | uracil phosphoribosyltransferase                                                             | upp        | -3.1                  | 0.0000  |
| WP_000180655.1  | 2-oxoglutarate dehydrogenase E1 component                                                    | odhA       | -3.2                  | 0.0000  |
| WP_000472293.1  | ATP-dependent Clp protease ATP-binding subunit ClpX                                          | clpX       | -3.2                  | 0.0000  |
| WP_000745926.1  | clumping factor B (ClfB)                                                                     | clfB       | -3.2                  | 0.0027  |
| WP_000358009.1  | UDP-N-acetylglucosamine 1-carboxyvinyltransferase                                            | murA1      | -3.2                  | 0.0017  |
| WP_0001218603.1 | aerobic glycerol-3-phosphate dehydrogenase                                                   | glpD       | -3.2                  | 0.0027  |
| WP_000168845.1  | Fe-S cluster assembly ATPase SufC                                                            | AID39350.1 | -3.2                  | 0.0000  |
| WP_000040043.1  | phosphoenolpyruvate--protein phosphotransferase                                              | ptsI       | -3.3                  | 0.0000  |
| WP_001063330.1  | ATP-dependent Clp protease ATP-binding subunit                                               | clpL       | -3.3                  | 0.0016  |
| WP_001167888.1  | ATP-dependent metalloproteinase FtsH/Yme1/Tma family protein                                 | ftsH       | -3.3                  | 0.0000  |
| WP_000417008.1  | 2-hydroxyacid dehydrogenase                                                                  | AID40993.1 | -3.3                  | 0.0000  |
| WP_001049165.1  | ATP-dependent Clp protease proteolytic subunit ClpP (subunit specified manually)             | clpP       | -3.3                  | 0.0000  |
| WP_001251219.1  | glucosamine-6-phosphate isomerase                                                            | AID40324.1 | -3.4                  | 0.0000  |
| WP_000368166.1  | DNA recombination/repair protein RecA                                                        | recA       | -3.4                  | 0.0000  |
| WP_000024830.1  | 50S ribosomal protein L4                                                                     | rplD       | -3.5                  | 0.0000  |
| WP_001288196.1  | lysine--tRNA ligase                                                                          | lysS       | -3.5                  | 0.0000  |
| WP_000727325.1  | DUF4889 domain-containing protein                                                            | AID41078.1 | -3.5                  | 0.0000  |
| WP_001270861.1  | glutamate-1-semialdehyde 2,1-aminomutase                                                     | hemL1      | -3.5                  | 0.0000  |
| WP_000055337.1  | GTP-sensing pleiotropic transcriptional regulator CodY                                       | codY       | -3.5                  | 0.0000  |
| WP_000268754.1  | 30S ribosomal protein S16                                                                    | rpsP       | -3.6                  | 0.0105  |
| WP_000225845.1  | bifunctional methylenetetrahydrofolate dehydrogenase/methenyltetrahydrofolate cyclohydrolase | folD       | -3.6                  | 0.0000  |
| WP_000926310.1  | 50S ribosomal protein L16                                                                    | rplP       | -3.6                  | 0.0000  |
| WP_001031880.1  | L-lactate dehydrogenase                                                                      | ldh1       | -3.6                  | 0.0000  |
| WP_001020801.1  | succinyl-CoA ligase subunit beta                                                             | sucC       | -3.6                  | 0.0000  |
| WP_000506536.1  | protein translocase subunit SecA 1                                                           | secA1      | -3.6                  | 0.0000  |
| WP_001096577.1  | 50S ribosomal protein L30                                                                    | rpmD       | -3.7                  | 0.0000  |
| WP_001126603.1  | glutamine synthetase                                                                         | glnA       | -3.7                  | 0.0000  |
| WP_000149412.1  | formate--tetrahydrofolate ligase                                                             | fhs        | -3.7                  | 0.0000  |
| WP_000178881.1  | 30S ribosomal protein S8                                                                     | rpsH       | -3.7                  | 0.0000  |
| WP_001018328.1  | 30S ribosomal protein S15                                                                    | rpsO       | -3.7                  | 0.0000  |
| WP_000160212.1  | 50S ribosomal protein L3                                                                     | rplC       | -3.7                  | 0.0000  |
| WP_000542274.1  | 50S ribosomal protein L17                                                                    | rplQ       | -3.7                  | 0.0000  |
| WP_000954802.1  | nitric oxide dioxygenase                                                                     | AID38659.1 | -3.7                  | 0.0000  |
| WP_001074521.1  | bifunctional autolysin Atl                                                                   | atl        | -3.8                  | 0.0019  |
| WP_000766074.1  | 50S ribosomal protein L15                                                                    | rplO       | -3.9                  | 0.0000  |
| WP_000918664.1  | DNA-directed RNA polymerase subunit beta                                                     | rpoB       | -3.9                  | 0.0000  |
| WP_000388082.1  | 50S ribosomal protein L23                                                                    | rplW       | -3.9                  | 0.0000  |
| WP_001030080.1  | glycine--tRNA ligase                                                                         | glyQS      | -3.9                  | 0.0000  |
| WP_001790547.1  | 30S ribosomal protein S9                                                                     | rpsI       | -3.9                  | 0.0000  |
| WP_000644737.1  | 50S ribosomal protein L29                                                                    | rpmC       | -4.0                  | 0.0000  |
| WP_000424963.1  | GMP synthase (glutamine-hydrolyzing)                                                         | guaA       | -4.0                  | 0.0000  |
| WP_000383814.1  | DUF948 domain-containing protein                                                             | AID40210.1 | -4.1                  | 0.0000  |
| WP_000855505.1  | class 1b ribonucleoside-diphosphate reductase subunit alpha                                  | nrdE       | -4.1                  | 0.0000  |
| WP_000167322.1  | ornithine--oxo-acid transaminase                                                             | AID39393.1 | -4.1                  | 0.0000  |
| WP_000034728.1  | pyridoxal 5'-phosphate synthase lyase subunit PdxS                                           | pdxS       | -4.1                  | 0.0000  |
| WP_000124353.1  | 30S ribosomal protein S19                                                                    | rpsS       | -4.2                  | 0.0000  |

| Entry name     | Protein function                                                            | STRING ID  | Log <sub>2</sub> ΔLFQ | q value |
|----------------|-----------------------------------------------------------------------------|------------|-----------------------|---------|
| WP_000090514.1 | 30S ribosomal protein S4                                                    | rpsD       | -4.2                  | 0.0000  |
| WP_001260089.1 | triose-phosphate isomerase                                                  | tpiA       | -4.2                  | 0.0000  |
| WP_000511135.1 | ATP synthase subunit beta                                                   | atpD       | -4.2                  | 0.0017  |
| WP_001085792.1 | 50S ribosomal protein L11                                                   | rplK       | -4.2                  | 0.0000  |
| WP_000437472.1 | phosphocarrier protein HPr                                                  | AID39520.1 | -4.3                  | 0.0000  |
| WP_000101625.1 | 30S ribosomal protein S11                                                   | rpsK       | -4.3                  | 0.0000  |
| WP_001074353.1 | carbamate kinase 1                                                          | arcC1      | -4.3                  | 0.0000  |
| WP_001178940.1 | DEAD/DEAH box family ATP-dependent RNA helicase                             | cshA       | -4.4                  | 0.0000  |
| WP_077670278.1 | clumping factor A (ClfA)                                                    | clfA       | -4.4                  | 0.0000  |
| WP_000181404.1 | 50S ribosomal protein L19                                                   | rplS       | -4.4                  | 0.0000  |
| WP_000774286.1 | phosphate acetyltransferase                                                 | pta        | -4.5                  | 0.0000  |
| WP_000660054.1 | argininosuccinate synthase                                                  | argG       | -4.5                  | 0.0000  |
| WP_000387527.1 | 50S ribosomal protein L22                                                   | rplV       | -4.6                  | 0.0000  |
| WP_000157650.1 | 50S ribosomal protein L25                                                   | ctc        | -4.7                  | 0.0000  |
| WP_000136159.1 | ornithine carbamoyltransferase ArcB                                         | arcB       | -4.7                  | 0.0000  |
| WP_000068176.1 | pyruvate dehydrogenase E1 component subunit beta                            | pdhB       | -4.7                  | 0.0026  |
| WP_000617735.1 | ribosomal subunit interface protein                                         | hpf        | -4.8                  | 0.0000  |
| WP_001074749.1 | phosphoglycerate kinase                                                     | pgk        | -4.8                  | 0.0000  |
| WP_000442480.1 | nucleoside-diphosphate kinase                                               | ndk        | -5.0                  | 0.0000  |
| WP_000959426.1 | alanine dehydrogenase                                                       | ald1       | -5.1                  | 0.0000  |
| WP_000825534.1 | methionine ABC transporter substrate-binding protein (aka NLPA lipoprotein) | AID38955.1 | -5.6                  | 0.0173  |
| WP_000210828.1 | serine/threonine dehydratase                                                | tdcB       | -5.6                  | 0.0000  |
| WP_001043863.1 | DNA-binding protein HU                                                      | AID39935.1 | -6.3                  | 0.0000  |
| WP_001242307.1 | pyrimidine-nucleoside phosphorylase                                         | pdp        | -6.3                  | 0.0000  |
| WP_000634175.1 | universal stress protein UspA                                               | AID40179.1 | -6.4                  | 0.0000  |
| WP_001131841.1 | fructose-bisphosphate aldolase                                              | fba        | -6.7                  | 0.0000  |

## References

- Almagro Armenteros, J.J., Tsirigos, K.D., Sønderby, C.K., Petersen, T.N., Winther, O., Brunak, S., Von Heijne, G., and Nielsen, H. (2019). SignalP 5.0 improves signal peptide predictions using deep neural networks. *Nat Biotechnol* 37, 420-423.
- Bendtsen, J.D., Kierner, L., Fausbøll, A., and Brunak, S. (2005). Non-classical protein secretion in bacteria. *BMC Microbiol* 5, 58.
- Brohée, S., and Van Helden, J. (2006). Evaluation of clustering algorithms for protein-protein interaction networks. *BMC Bioinformatics* 7, 488.
- Szklarczyk, D., Gable, A.L., Lyon, D., Junge, A., Wyder, S., Huerta-Cepas, J., Simonovic, M., Doncheva, N.T., Morris, J.H., Bork, P., Jensen, L.J., and Mering, C.V. (2019). STRING v11: protein-protein association networks with increased coverage, supporting functional discovery in genome-wide experimental datasets. *Nucleic Acids Res* 47, D607-d613.
